## Exon-based Phylogenomics and the Relationships of African Cichlid Fishes: Tackling the Challenges of Reconstructing Phylogenies with Repeated Rapid Radiations

VIVIANA ASTUDILLO-CLAVIJO<sup>1,2,3,\*</sup>, MELANIE L.J. STIASSNY<sup>4</sup>, KATRIINA L. ILVES<sup>5</sup>, ZUZANA MUSILOVA<sup>6</sup>, WALTER SALZBURGER<sup>7</sup>, AND HERNÁN LÓPEZ-FERNÁNDEZ<sup>1,2,3</sup> 

<sup>1</sup>Department of Ecology and Evolutionary Biology, University of Toronto, 25 Willcocks St., Toronto, ON M5S 3B2, Canada; <sup>2</sup>Department of Natural History, Royal Ontario Museum, 100 Queens Park, Toronto, ON M5S 2C6, Canada; <sup>3</sup>Department of Ecology and Evolutionary Biology and Museum of Zoology, University of Michigan, Biological Science Building, 1105 N University Ave., Ann Arbor, MI 48109, USA; <sup>4</sup>Department of Ichthyology, American Museum of Natural History, 200 Central Park West, New York, NY 10024-5102, USA; <sup>5</sup>Department of Zoology, Canadian Museum of Nature, 240 McLeod St., Ottawa, ON K2P 2R1, Canada; <sup>6</sup>Department of Zoology, Charles University in Prague, Vinicna 7, Prague, Central Bohemia, CZ-128 44, Czech Republic; and <sup>7</sup>Department of Environmental Sciences, Zoological Institute, University of Basel, Vesalgasse 1, CH-4051 Basel, Basel-Stadt, Switzerland  
 \*Correspondence to be sent to: Department of Ecology and Evolutionary Biology and Museum of Zoology, University of Michigan, Biological Science Building, 1105 N University Ave., Ann Arbor, MI 48109, USA;  
 E-mail: [viviana@umich.edu](mailto:viviana@umich.edu).

Received 12 August 2021; reviews returned 6 July 2022; accepted 19 July 2022  
 Associate Editor: Liliana Dávalos

**Abstract.**—African cichlids (subfamily: Pseudocrenilabrinae) are among the most diverse vertebrates, and their propensity for repeated rapid radiation has made them a celebrated model system in evolutionary research. Nonetheless, despite numerous studies, phylogenetic uncertainty persists, and riverine lineages remain comparatively underrepresented in higher-level phylogenetic studies. Heterogeneous gene histories resulting from incomplete lineage sorting (ILS) and hybridization are likely sources of uncertainty, especially during episodes of rapid speciation. We investigate the relationships of Pseudocrenilabrinae and its close relatives while accounting for multiple sources of genetic discordance using species tree and hybrid network analyses with hundreds of single-copy exons. We improve sequence recovery for distant relatives, thereby extending the taxonomic reach of our probes, with a hybrid reference guided/*de novo* assembly approach. Our analyses provide robust hypotheses for most higher-level relationships and reveal widespread gene heterogeneity, including in riverine taxa. ILS and past hybridization are identified as the sources of genetic discordance in different lineages. Sampling of various Blenniiformes (formerly Ovalentaria) adds strong phylogenomic support for convict blennies (Pholidichthyidae) as sister to Cichlidae and points to other potentially useful protein-coding markers across the order. A reliable phylogeny with representatives from diverse environments will support ongoing taxonomic and comparative evolutionary research in the cichlid model system. [African cichlids; Blenniiformes; Gene tree heterogeneity; Hybrid assembly; Phylogenetic network; Pseudocrenilabrinae; Species tree.]

A reliable phylogeny is a necessary foundation for investigating evolutionary processes. Despite substantial efforts, however, recalcitrant nodes and uncertainty persist for some groups, including diverse clades with rapid radiations considered model systems in evolutionary research (Murphy et al. 2007; Jarvis et al. 2014; Hughes et al. 2018; Takahashi and Sota 2016). African cichlids (Blenniiformes *sensu* Ghezelayagh et al. 2021: Cichlidae: Pseudocrenilabrinae) are a celebrated model system for studies of speciation, adaptation, and rapid radiation (Seehausen 2006). They are the largest cichlid subfamily with 1700+ species (Turner 2007; Seehausen 2015; Froese and Pauly 2021) inhabiting rivers and lakes across Africa and include five species in the Jordan Valley and coastal basins of southern Iran (Fig. 1). Some lineages underwent rapid radiations in east African Great Lakes (Kocher 2004; Seehausen 2006), various small lakes around the continent (Roberts and Kullander 1994; Schliewen et al. 1994; Joyce et al. 2005; Seehausen 2006; Ford et al. 2016), and the lower Congo river basin (Schwarzer et al. 2011; Stiassny and Alter 2021), but still others have remained relatively species poor. Such striking disparity among lineages has spurred research into diversification along an array of dimensions (e.g.,

phenotypic, molecular, and environmental) in an effort to reveal intrinsic and extrinsic factors that influence speciation and adaptation in cichlids (Hulsey and García de León 2005; Seehausen 2006; Wagner et al. 2012; López-Fernández et al. 2013; Brawand et al. 2014; Astudillo-Clavijo et al. 2015; Arbour and López-Fernández 2016; Ivory et al. 2016; Burress et al. 2017; Meier et al. 2017; Salzburger 2018; Ronco et al. 2021). Despite the significance of African cichlids in evolutionary research, uncertainty persists at several deep nodes and riverine lineages remain underrepresented in most higher-level phylogenetic hypotheses. A reliable phylogeny with broad sampling across tribes from diverse environments is crucial for furthering macroevolutionary research in the cichlid model system.

Monophyly of Pseudocrenilabrinae is strongly supported by molecular data (Farias et al. 1999, 2000; Sparks and Smith 2004; Keck and Hulsey 2014), and its internal relationships have been explored to various degrees with morphological, multilocus, and genomic data (see Appendix S1 of the Supplementary material available on Dryad at <http://dx.doi.org/10.5061/dryad.d7wm37q26> for review of previous phylogenetic findings). Currently, 26–28 tribes are formally or informally recognized

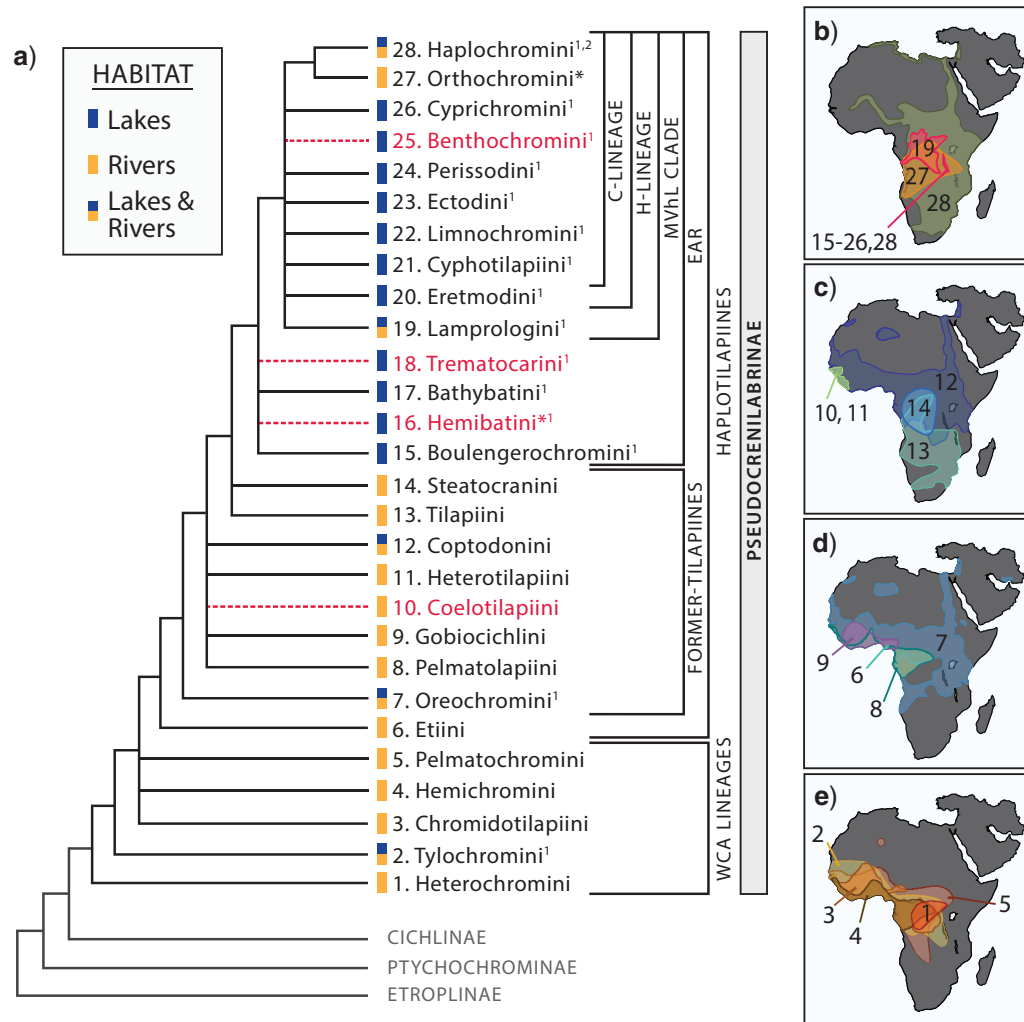

FIGURE 1. (Color online) Cichlidae and Pseudocrenilabrinae relationships prior to this work (a) and distribution of Pseudocrenilabrinae tribes (b–e). a) Pseudocrenilabrinae relationships are based on combined evidence from existing molecular phylogenies. Bifurcating branches indicate robust relationships. Polytomies show conflicting or poorly supported nodes. Dashed (red) branches are tribes that were not sampled in this study. Square brackets to the right of the phylogeny denote commonly recovered tribal assemblages or groupings discussed throughout the text: WCA, West/Central African Lineages; EAR, East African Radiations Clade; MVhL, Malawi, Victoria, H-Lineage and Lamprologini Clade; H-Lineage, Haplochromini and remaining Tanganyikan tribes; C-Lineage, H-Lineage minus Eretmodini. <sup>1</sup>Tribes with Tanganyikan endemics. <sup>2</sup>The Malawi and Victoria system radiations are nested within Haplochromini. \*Tribes with disputed taxonomic status. Rectangles next to tribe names indicate tribes with riverine and/or lacustrine lineages. Numbering of tribes matches numbers in the distribution maps (b–e). b) EAR tribes 15–28. c) Former-tilapiine tribes 10–14. d) Etiini and former-tilapiine tribes 7–9. e) WCA tribes 1–5. See Figure S1 in Appendix S1 of the Supplementary material available on Dryad for individual tribal distribution maps.

and some form part of consistently recovered tribal assemblages (Fig. 1a). Relationships within the East African Radiations (EAR) clade, which contain most lake taxa, have been assessed most thoroughly (e.g., Dunz and Schlieven 2013; Weiss et al. 2015; Takahashi and Sota 2016; Ronco et al. 2020). By contrast, few detailed hypotheses are available for the various early diverging and largely riverine lineages. Representation of the oldest West/Central African tribes (henceforth WCA lineages) and early haplotilapiines (Schlieven and Stiassny 2003) formerly grouped into the catch-all Tilapiini (*sensu* Poll 1986 minus Boulengerochromini, Takahashi 2003; Dunz and Schlieven 2013; henceforth former-tilapiines) has generally been limited to a handful

of species with the aim of addressing family-level (Streelman and Karl 1997; Streelman et al. 1998; Sparks and Smith 2004; Friedman et al. 2013), Neotropical (Farias et al. 1999, 2000; Smith et al. 2008; Ilves et al. 2018), or EAR relationships (Sültmann et al. 1995; Mayer et al. 1998; Salzburger et al. 2005; Genner et al. 2007; Schedel et al. 2019; Ronco et al. 2021). Studies with a larger sampling of WCA and former-tilapiine taxa are usually focused on shallower intrageneric (Schwarzer et al. 2011; Ford et al. 2019) or intratribal (Martin et al. 2015; Schwarzer et al. 2015) relationships. Consequently, densely sampled hypotheses of higher-level Pseudocrenilabrinae relationships are currently represented by primarily multilocus phylogenies (but see Irisarri et al. 2018), most

of which have limited riverine representation and reveal variously conflicting topologies (Schwarzer et al. 2009; Dunz and Schlieven 2013; Matschiner et al. 2017; Schedel et al. 2019).

The growing availability of large molecular data sets is revealing genetic discordance, the presence of conflicting evolutionary histories amongst loci and between loci and the underlying species tree, as an important contributor to persistent phylogenetic uncertainty (Maddison 1997; Edwards 2009; Jarvis et al. 2014; Hughes et al. 2018; Irisarri et al. 2018; Salzburger 2018). Incomplete lineage sorting (ILS) and hybridization are foremost sources of gene heterogeneity, especially in rapidly radiating clades like cichlids (Takahashi et al. 2001; Koblmüller et al. 2010; Martin et al. 2015; Meier et al. 2017; Malinsky et al. 2018; McGee et al. 2020) and various others (Whitefield and Lockhard 2007; Litsios and Salamin 2014; Suh et al. 2015; Grant and Grant 2019; Cai et al. 2021; Morales-Briones et al. 2021). Irrespective of its source, elevated gene heterogeneity can positively mislead (Felsenstein 1978) phylogenetic inference when unaccounted for (Kubatko and Degnan 2007; Liu et al. 2015; Roch and Steel 2015; Mirarab et al. 2016).

Several high-throughput sequencing methods can now yield hundreds to thousands of loci (Miller et al. 2007; Faircloth et al. 2012; Lemmon et al. 2012) comprising more representative samples of alternative genealogies than small multilocus data sets. Targeted sequence capture is particularly appealing as it allows for the curation of data sets to meet specific challenges of the focal group. Target capture with taxon-specific probes provides added control over locus identity, capture rates, the proportion of informative sites, and capture of paralogs (Ilves and López-Fernández 2014; Chau et al. 2018; Hughes et al. 2018; Jiang et al. 2019).

Complementary phylogenetic methods that account for the diversity of sampled gene histories are also on the rise, fueled by a recognition of traditional concatenation's vulnerability to systematic error in the presence of gene heterogeneity (Degnan and Rosenberg 2009; Roch and Warnow 2015). Coalescent species tree methods are most commonly applied as these tend to outperform concatenation with rising gene heterogeneity (Kubatko and Degnan 2007; Davidson et al. 2015; Liu et al. 2015; Roch and Steel 2015; Mirarab et al. 2016). Species tree methods assume ILS to be the prime source of discordance and do not explicitly account for other processes, such as hybridization (Solís-Lemus et al. 2016, but see Davidson et al. 2015). Approaches that model gene flow in the presence of ILS are also available, but their application to phylogenomic or taxonomically rich data sets has been more limited due to high computational demands and restricted scalability (Kubatko 2009; Meng and Kubatko 2009; Yu et al. 2012, 2014; Solís-Lemus and Ané 2016).

Together, the accessibility of large curated molecular data sets, advances in phylogenetic methods that conform to theoretical models of speciation, and a growing awareness of conditions affecting the performance of traditional and emerging methods make us well poised to tackle some of the most stubborn phylogenetic

challenges. Here, we investigate relationships of the African cichlid subfamily, Pseudocrenilabrinae, and its close relatives in light of ILS and hybridization using hundreds of cichlid-specific single-copy exons (Ilves and López-Fernández 2014). We sample various Blenniiformes (formerly Ovalentaria) families for a phylogenomic test of the sister relationship between Cichlidae and the phenotypically divergent marine convict blenny, *Pholidichthys* (Wainwright et al. 2012; Betancur-R et al. 2013; Near et al. 2013; Ghezelayagh et al. 2021). We further assess the taxonomic reach of our probes and implement a hybrid guided/*de novo* assembly approach to improve data recovery in distant relatives. This study provides the most densely sampled phylogenomic hypothesis of higher-level Pseudocrenilabrinae relationships and is among the first to apply both coalescent and hybrid network approaches across nearly every tribe and both lake and river taxa.

## MATERIALS AND METHODS

### Taxon Selection

We sampled 24 of 26–28 Pseudocrenilabrinae tribes (Fig. 1). Nearly, every tribe containing riverine lineages was sampled. A number of endemic species flocks, beyond the African Great Lakes, were represented: lower Congo River (*Nanochromis*, *Steatocranus*, *Teleogramma*, and *Lamprologus*), Cameroonian crater lakes Barombi Mbo (*Oreochromini*) and Bermin (*Coptodon*), soda lakes Natron and Magadi (*Alcolapia*), Lake Fwa (*Haplochromini*), and Pleistocene Lake palaeo-Magadikgadi (*serranochromines*). Only a handful of Malawi and Victoria lake species was sampled since they represent closely related clades nested well within Haplochromini (Friedman et al. 2013; Meyer et al. 2015; Matschiner et al. 2017; McGee et al. 2020). Quotations denote taxa awaiting formal description and nonmonophyletic genera that exclude the type species. We herein recognize Chromidotilapiini and Pelmatochromini as tribes, given existing support for the monophyly of these currently informally designated clades (Schwarzer et al. 2011, 2015; Dunz and Schlieven 2013). Tribal assemblages are referred to using the suffix “ines” (e.g., haplotilapiines).

Outside Pseudocrenilabrinae, we sampled representatives of the three other cichlid subfamilies and 11 closely related Blenniiformes families, inclusive of the proposed sister to Cichlidae and Pholidichthyidae (Wainwright et al. 2012). Our final data set had 178 terminals, with 165 cichlids (Pseudocrenilabrinae: 150, Cichlinae: 3, Etroplinae: 5, Ptychochrominae: 7) and 13 noncichlid blenniiforms. Tables S1–S5 of the Supplementary material available on Dryad contain taxonomic and locus information.

### DNA Sequencing and Processing: From Raw Reads to Multiple Sequence Alignments

Genomic DNA was extracted from preserved tissues using the DNeasy Blood and Tissue kit (Qiagen, Venlo, the Netherlands). Library preparation



and high-throughput paired-end sequencing (Illumina HiSeq) were performed at the University of Toronto Donnelly Sequencing Centre (<http://dsc.utoronto.ca/dsc/index.html>). A set of probes designed based on a Nile tilapia (*Oreochromis niloticus*) genome (BioMart Ensembl Genes 69 database; Flicek et al. 2013) was used for targeted sequence capture of 923 single-copy exons ranging in length from 750 to 2000 bp (Ilves and López-Fernández 2014).

Reads were filtered and trimmed in prinseq 0.20.3 lite (Schmieder and Edwards 2011) and assembled into target exons with one of three approaches, depending on the amount of recoverable data (Fig. S2 of the Supplementary material available on Dryad). First, reads were mapped to tilapia reference sequences and assembled in Bowtie2 2.2.0 (Langmead and Salzberg 2012) with the `-very-sensitive-local` preset. Consensus sequences with a minimum read depth of 10 were generated using SAMtools 0.1.19 (Li et al. 2009) and Biopython's SeqIO.convert (Cock et al. 2009).

Bowtie2 assembly yielded more data for African and Neotropical cichlids (Fig. S2, Tables S3 and S4 of the Supplementary material available on Dryad), which shared a common ancestor with tilapia more recently than Indo-Malagasy Etroplinae and Ptychochrominae subfamilies and noncichlid blenniiforms (Fig. 1a). Mutations accumulated since divergence may have reduced probe efficacy and interfered with read mapping to tilapia references during Bowtie2 assembly. We therefore applied two modified assembly protocols aimed at increasing bp yield for these more distant taxa.

A hybrid reference guided/*de novo* assembly approach was used for seven Etroplinae and Ptychochrominae with the lowest rates of data recovery. Hybrid assembly consisted of three stages (see Appendices S2 and S3 and Fig. S3 of the Supplementary material available on Dryad for details and scripts). (i) An initial set of consensus exons was obtained through guided assembly with tilapia references using BWA-MEM 0.7.12 (Li and Durbin 2009; Li 2013), with more lenient mapping parameters than Bowtie2 and a minimum read depth of six. (ii) A second set of consensus exons with a minimum depth of six was assembled *de novo* in Velvet 1.0.17 (Zebrino and Birney 2008; Zebrino 2009; Crawford 2010). (iii) Guided and *de novo* assembled exons were aligned in MUSCLE v3.8.31 (Edgar 2004), from which a final set of consensus exons was extracted. In this way, sections missing from guided-assembled exons were complemented by novel regions obtained through *de novo* assembly. Visual inspection of alignments in Geneious 7.0.6 (<http://www.geneious.com>, Kearse et al. 2012) confirmed that sections spanned by both guided and *de novo* assemblies were identical, providing reassurance that exclusively *de novo* regions were accurately recovered.

For the remaining five Indo-Malagasy cichlids and 13 Blenniiformes outgroups, we applied a reduced-sensitivity assembly approach, equivalent to the first stage of hybrid assembly. High-throughput sequencing

has proven especially difficult for *Pholidichthys*, with our (Table S4 of the Supplementary material available on Dryad) and previous (Eyta et al. 2015; pers. obs.) attempts resulting in reduced sequence recovery relative to other taxa in the same data set. In this study, we maximized informative sites by combining sequences from three individuals into a single set of consensus exons for *Pholidichthys* (Tables S1 and S4 of the Supplementary material available on Dryad). We ensured that exons from different individuals were correctly aligned for consensus generation by ascertaining that sections recovered across individuals were identical.

We identified coding and noncoding regions and codon positions in our targets by aligning them to annotated tilapia mRNA retrieved from GenBank (NCBI *Oreochromis niloticus* Annotation Release 103; Accession No. GCF\_001858045.1; Clark et al. 2016) using a custom script (Appendix S4 of the Supplementary material available on Dryad; Altschul et al. 1990; Maglott et al. 2005; R Core Team 2015). Knowledge of coding regions was used to assist with alignment editing and delineation of partition schemes for PartitionFinder analyses.

Assembled cichlid and outgroup sequences were aligned using MUSCLE. Alignments were visually inspected and manually edited to ensure open reading frame in Geneious, based on our determination of coding regions. A limited amount of missing taxonomic and character data was permitted since some missing data are unlikely to be problematic in large data sets (Jiang et al. 2014; Xi et al. 2016; Nute et al. 2018). Final alignments contained at least 70% of taxa (124 species) and sequences spanning 30% or more of the corresponding tilapia reference. Exon alignments were also concatenated into a supermatrix.

PartitionFinder v1.1.1 (Lanfear et al. 2012) was run on individual exons partitioned by coding and noncoding regions and codon position, and on the supermatrix partitioned by exon and coding and noncoding regions. A single data block was identified as the best partitioning scheme for individual exons and for the supermatrix. The best fitting models were GTR+G for the supermatrix, and either GTR+G or GTR+G+I for individual exons (Table S2 of the Supplementary material available on Dryad).

#### *Phylogenetic Inference: Concatenation, Species, and Network Analyses*

Maximum likelihood (ML) concatenation analysis was performed with the supermatrix in CIPRES Science Gateway (Miller et al. 2010). We used RAXML-HPC v.8 on XSEDE (8.2.10) (Stamatakis 2014) with GTR+G and 1000 rapid bootstrap replicates.

A species tree approach was used to infer relationships in light of gene heterogeneity under ILS. ML gene trees were estimated for 588 exons (available on GenBank, BioProject PRJNA853788) in raxmlHPC-MPI-SSE3 v8.2.8 with GTR+G and 1000 rapid bootstrap replicates. A species tree was inferred from gene trees in ASTRAL-II

v.4.10.8 (Mirarab and Warnow 2015) with 700 bootstrap replicates. Local posterior probabilities, alternative quartet support (ASTRAL), and gene concordance factors (IQ-TREE; Minh et al. 2020a,b) were also calculated for the ASTRAL tree to assess topological robustness under various support metrics and to quantify gene heterogeneity. Node-specific gene tree conflict was visualized with pie charts obtained using ape 5.0's "nodelabels" function (Paradis and Schliep 2019) with "pie" equal to ASTRAL's  $q1-q3$  values.

Poorly or incorrectly resolved gene trees can mislead species trees (Gatesy and Springer 2014; Mirarab and Warnow 2015). We assessed locus information content by quantifying parsimony informative sites and summarizing node support at various gene tree depths (first 25%, 50%, 75%, and 100% of total depth) and for different locus lengths. We also investigated the possible impacts of gene tree error, including model misspecification, by inferring three additional ASTRAL trees based on alternative sets of gene trees. One set contained gene trees with nodes supported by less than 10% bootstrap collapsed (Mirarab and Warnow 2015; Zhang et al. 2018). Another set re-estimated a subset of gene trees (Table S2 of the Supplementary material available on Dryad) with the GTR+G+I model, as suggested by PartitionFinder (see Appendix S2). For the third set, we reassessed the fit of over 200 substitution models not implemented in RAxML and re-estimated gene trees in IQ-TREE 1.6.12 (Nguyen et al. 2015). We also investigated base compositional heterogeneity, a common source of model misspecification (Foster 2004), with  $\chi^2$  test in IQ-TREE. Alternative ASTRAL species trees were compared with the weighted Robinson–Foulds distance (Robinson and Foulds 1981) in phangorn 2.8.1 (Schliep 2011).

Finally, we tested for hybridization and its impacts on the resolution of Pseudocrenilabrinae relationships using PhyloNetworks' SNaQ phylogenetic network analyses (Bezanson et al. 2017; Solís-Lemus et al. 2017). Due to SNaQ's computational demands, we focused on eight taxonomic subsets to assess hybridization at various phylogenetic scales. For each subset, ASTRAL species and ML gene trees were pruned to a selection of representative species, and only gene trees containing all representatives were incorporated. Sub1 sampled across tribes to test for deep hybridization. Sub2 and Sub3 investigated hybridization for WCA lineages. Sub4 considered hybridization amongst former-tilapiines. Sub5 investigated hybridization within Barombi Mbo, Natron/Magadi, and Bermin lake flocks, and between these and their close riverine relatives. Sub6 assessed deep hybridization between former-tilapiine and EAR taxa. Sub7 focused on hybridization among EAR tribes. Sub8 looked for hybridization within Lamprologini and between it and its close relatives. SNaQ analyses were performed with the ASTRAL starting topology and incremental increases of  $h_{\max} = n + 1$  for 20 runs. Analyses were considered complete when tree scores stabilized within two pseudolikelihood points. Support for hybrid networks was assessed with 100 bootstrap replicates.

Concatenated, species, hybrid network, and gene tree topologies were compared by computing multivariate "tree spaces" in R's treespace 1.1.4.1 package (Jombart et al. 2017). Topological variability was quantified with tip–tip path difference (Steel and Penny 1993) and Kendall–Colijn (Kendall and Colijn 2016) metrics. Appendix S2 of the Supplementary material available on Dryad contains details for all methods used in this study.

## RESULTS

### Target Capture and Gene Tree Resolution

Alternative assembly contributed more data for Indo-Malagasy cichlids and outgroup taxa relative to initial Bowtie2 assemblies ( $t(16506.1) = 40.0, p = 0.0$ ; Fig. S4 of the Supplementary material available on Dryad). The span of target sequences increased by an average of  $16.8 \pm 22.7\%$  SD, and 1,624,734 bp and 1087 exons were added across taxa. Hybrid guided/*de novo* assembly showed the largest improvements, adding more characters and exons per taxon than the reduced-sensitivity approach (Fig. S4 of the Supplementary material available on Dryad). Ultimately, we obtained 588 exon alignments between 291 and 1938 bp (mean =  $1039 \pm 330.9$ ), for a final aligned supermatrix length of 610,990 bp. Alignments contained 124–178 (mean =  $166.5 \pm 8.4$ ) taxa and sequences spanning an average of  $89 \pm 9.7\%$  of their reference.

Loci informativeness increased with tree depth and locus length (Fig. 2b,c). IQ-TREE identified different best-fit models than PartitionFinder (Table S2 of the Supplementary material available on Dryad). Nevertheless, compositional heterogeneity tests showed that nearly no sequence violated the assumption of homogeneous base composition for GTR (mean proportion passed =  $0.98 \pm 0.01$ ; Table S2 of the Supplementary material available on Dryad), and therefore, our application of this highly parameterized model is not necessarily inappropriate. Indeed, the fixed application of GTR has been shown to yield accurate topologies even when it is not the best-fit model (Abadi et al. 2019). Moreover, comparisons of ASTRAL trees generated with different gene tree sets revealed highly congruent topologies (wRF: 0.021–0.058, Table S6 of the Supplementary material available on Dryad), especially along backbone relationships. Disagreements were restricted to a few shallow, poorly supported nodes, like Crater lake (*Coptodon* and Bermin) and Congolese (*Lamprologini*) species flocks whose resolution may require additional taxa and faster-evolving loci (Fig. S5 of the Supplementary material available on Dryad).

### Phylogenetic Relationships and Gene Tree Heterogeneity

Targeted exon capture provided generally well-resolved and consistent relationships across concatenated (Fig. 2d, Fig. S6 of the Supplementary material available on Dryad, mean bootstrap = 95.3), species

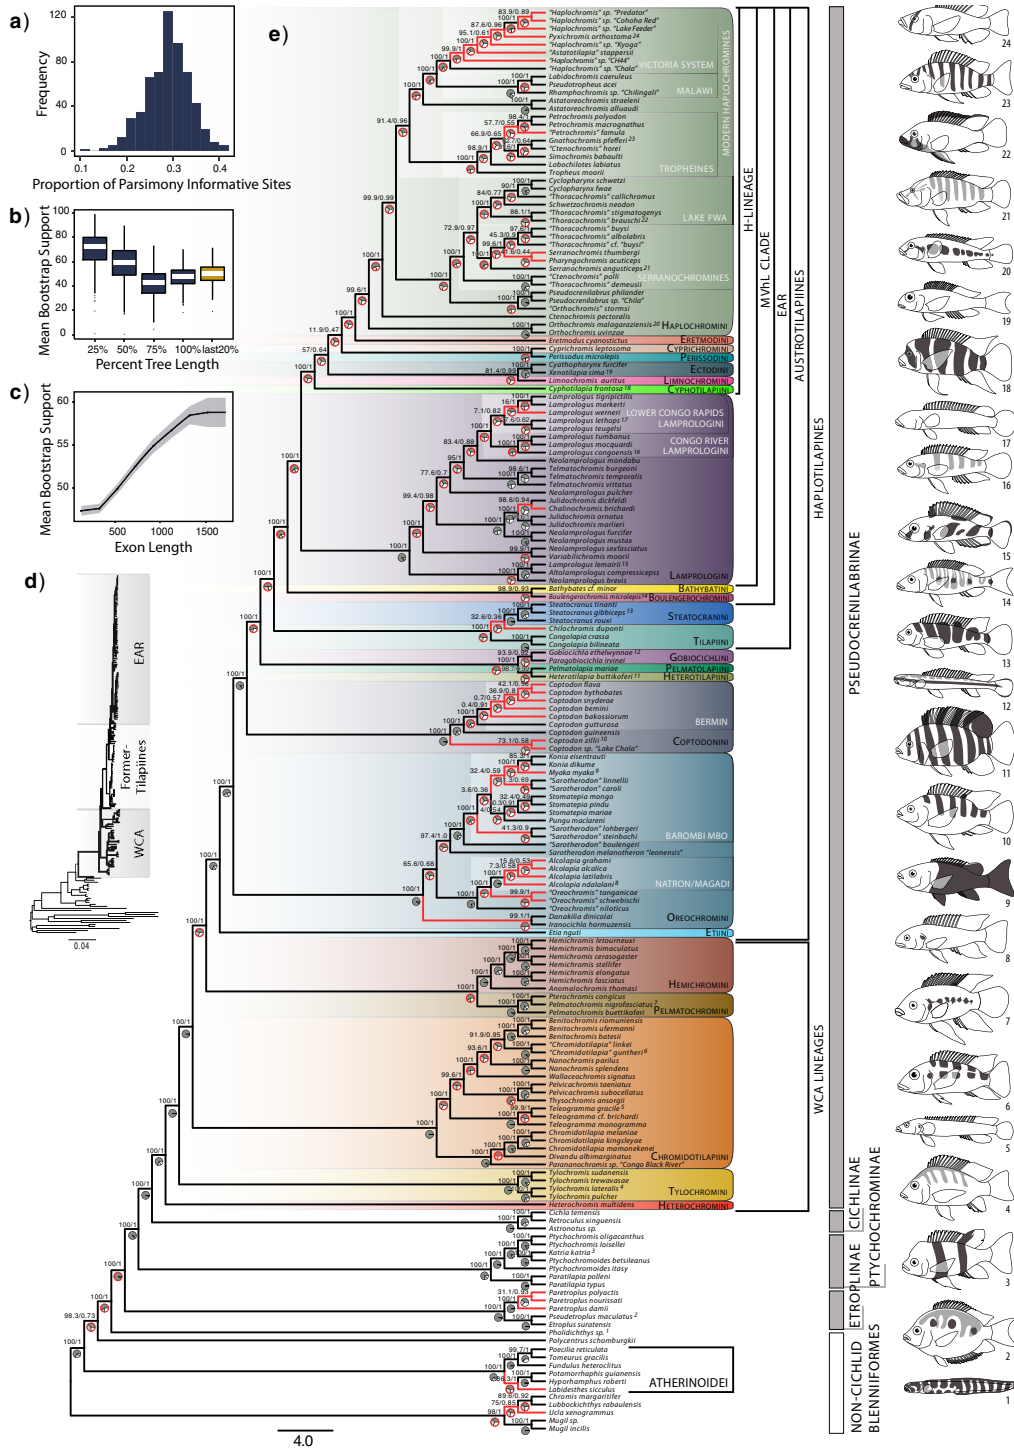

FIGURE 2. (Color online) Proportion of parsimony informative sites (a), gene tree resolution (b,c), and phylogenies (d,e) for Pseudocrenilabrinae and close relatives. b) Bootstrap support at various gene tree depths. The first four (blue) boxes correspond to increasing distances from the root, while the last (yellow) box corresponds to the shallowest 20% of tree depth. c) Bootstrap support and 95% confidence interval (shaded area) for gene trees inferred from loci of various lengths. d) Concatenated RAxML tree showing branch lengths; see Figure S6 of the Supplementary material available on Dryad for full annotations. e) ASTRAL-II species tree. Numbers above branches are bootstrap and local posterior probability support. Pie charts show gene tree support for the main (dark gray), and first (light gray) and second (white) alternative quartet topologies (i.e., ASTRAL's q1–q3 support values). Pies encircled with a thick (red) line indicate nodes that also had low gene concordance, below 50. Figure S8 of the Supplementary material available on Dryad contains full concordance factor annotations. Branches that differ between the species and concatenated phylogenies are lighter (red). Shaded (colored online) boxes with round edges and black names denote tribes, while nested boxes with square edges and white names indicate subclades discussed in the text. Square brackets to the right show tribal assemblages and noncichlid groupings. Gray and white vertical bars furthest to the right denote cichlid and non-cichlid Blenniiformes. Superscript numbers next to some species names indicate illustrated species to the right of the phylogeny. Illustrations by VAC.



(Fig. 2e, Fig. S5 and Table S6 of the Supplementary material available on Dryad) and phylogenetic network (Fig. 3) trees, despite widespread genetic discordance (Figs. 2e and 4, Figs. S7 and S8 of the Supplementary material available on Dryad). Quartet and gene concordance scores largely agreed in their identification of genetically inconsistent nodes (Fig. 2e, Fig. S8 of the Supplementary material available on Dryad). Disagreements between concatenated and species trees were limited to mainly shallow relationships (Figs. 2e and 4). Hybrid networks indicated a few more topological differences (Fig. 4b–i), some of which coincided with lineages possibly involved in hybridization events. Tree files are available in Appendices S5–S15 of the Supplementary material available on Dryad.

For noncichlid blenniiforms, we recovered two monophyletic clades: Atherinoidei (*sensu* Ghezelayagh et al. 2021, formerly Atherinomorpha) and an unnamed clade with the remaining families (Fig. 2e). The Pholidichthyidae+Cichlidae sister relationship was well supported, and this clade was in turn sister to the South American leaf-fishes (Polycentridae).

As expected, Cichlidae and its four subfamilies were monophyletic across analyses. Etroplinae and Ptychochrominae diverged prior to the African Pseudocrenilabrinae and Neotropical Cichlinae split. Pseudocrenilabrinae tribes and their interrelationships were for the most part well supported. A few challenging relationships persisted particularly within the EAR and recent rapid radiations (Fig. 2d).

Early divergence of Heterochromini was followed by successive branching of four other WCA tribes. Gene heterogeneity was elevated at some WCA nodes, including a sister relationship between Pelmatochromini+Hemichromini and the haplotilapiines. Hybridization was inferred among (Tylochromini–Chromidotilapiini, Hemichromini–Pelmatochromini; Fig. 3a,b) and within (Chromidotilapiini; Fig. 3c) WCA tribes with limited genetic exchange ( $\gamma < 0.25$ ), and also between WCA Hemichromini and the haplotilapiines (Fig. 3a).

The large haplotilapiine clade encompassed the remaining Pseudocrenilabrinae lineages. In contrast to WCA, haplotilapiines were characterized by widespread gene heterogeneity. This included not only clades known for their rapid diversification but also deeper nodes defining intertribal relationships. While concatenated and species trees agreed on nearly all intertribal relationships, phylogenetic networks inferred slightly different arrangements for some former-tilapiine and EAR tribes, with variably supported hybridization events.

Etiini was the sister to all other haplotilapiines, followed by Oreochromini, which contains the mouth-brooding former-tilapiines. Oreochromini formed two large clades. One contained the west/central African “*Sarotherodon*” and monophyletic Barombi Mbo flock. The other comprised “*Oreochromis*” and the soda lakes *Alcolapia* radiation. Barombi Mbo and *Alcolapia* groups had short and genetically inconsistent branches. A clade consisting of *Danakilia*, from the Danakil

Depression in Ethiopia/Eritrea, and *Iranocichla*, from southern Iran, was inconsistently placed as sister to all other oreochromines (Fig. 2e and Fig. S8b of the Supplementary material available on Dryad) or *Alcolapia*+“*Oreochromis*” (Figs. 3d,e and Figs. S6 and S8a,c of the Supplementary material available on Dryad). Hybridization was detected within the species flocks and for *Iranocichla* (Fig. 3d,e).

The remaining substrate spawning former-tilapiines diversified into several tribes near the base of the EAR. The early branching of Coptodonini and Heterotilapiini+Pelmatolapiini were well supported, but Gobiocichlini varied in its position as sister to Heterotilapiini+Pelmatolapiini (species and concatenated trees) or Tilapiini+Steatocranini (phylogenetic networks; Fig. 3d,f). Gene heterogeneity was widespread among former-tilapiines. Hybridization with high genetic exchange ( $\gamma \geq 30$ ) was detected between a Tilapiini-containing lineage and other substrate spawning former-tilapiines (Fig. 3a,d).

Tilapiini+Steatocranini was sister to the EAR in concatenated and species trees, but its placement varied in phylogenetic networks. One subset concurred with a Tilapiini+EAR clade (Fig. 3a), but another grouped Tilapiini+Steatocranini with former-tilapiines and inferred hybridization between Tilapiini+Steatocranini and an EAR ancestor (Fig. 3f).

The widely supported EAR clade comprised the endemic Tanganyikan tribes plus Lamprologini and Haplochromini. Bathybatini+Boulengerochromini was sister to the remaining EAR lineages, which together formed the MVhL clade (Takahashi et al. 2001) named for its inclusion of Malawi, Victoria, Nishida’s (1991) H-lineage (Fig. 1a) and Lamprologini taxa. A Lamprologini+H-Lineage sister relationship was robust.

Internal lamprologine relationships were mostly well resolved, despite short branches and high gene heterogeneity. Riverine *Lamprologus* endemic to the Congo basin formed a monophyletic grouping nested among Tanganyikan lineages. Several hybrid events were detected, of which the most strongly supported involved *Chalinochromis*+*Julidochromis* and *Telmatochromis* (Fig. 3h). Lamprologines may have also hybridized beyond the tribe, with the ancestor of the H-lineage (Fig. 3g,h) or Bathybatini (Fig. 3f).

The H-lineage was unambiguously supported. Concatenated and species trees produced identical topologies, but some highly heterogeneous nodes received equivocal support or differed from network analyses (Fig. 3a,f,g). Cyprichromini+Perissodini and Eretmodini+Haplochromini were consistently inferred. Ectodini+Limnochromini was supported by concatenated and species trees, but phylogenetic networks grouped Limnochromini+Cyphotilapiini and connected Ectodini to Limnochromini only through hybridization ( $\gamma = 0.17–0.34$ ; Fig. 3f,g). Additional hybrid events involving the H-lineage were inferred between the EAR ancestors and more nested Eretmodini+Haplochromini clades (Fig. 3a), Cyprichromini and Eretmodini

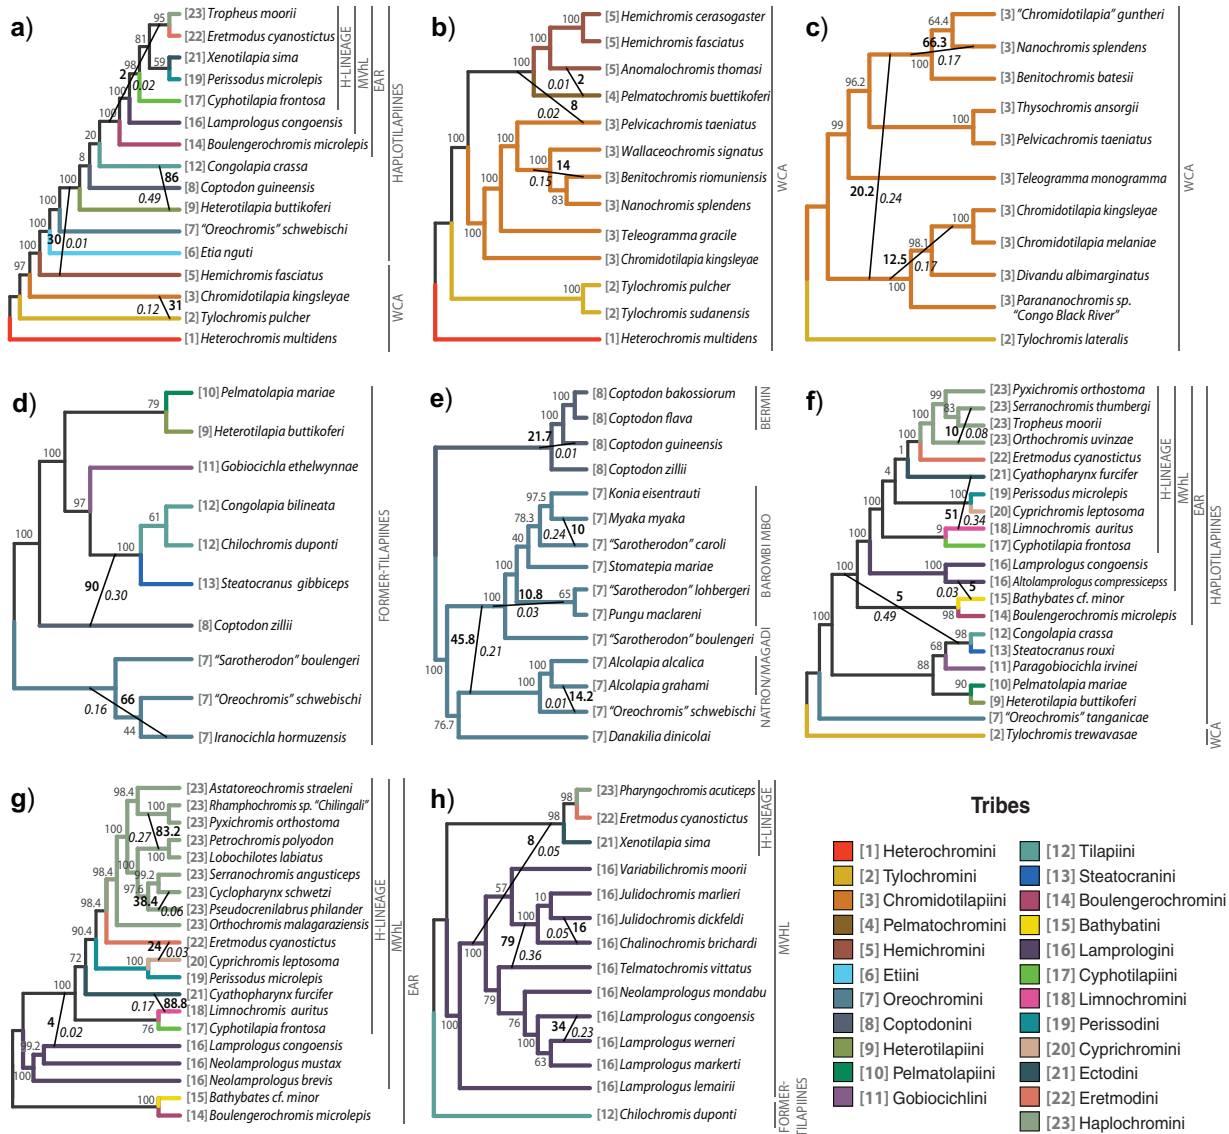

FIGURE 3. (Color online) Best phylogenetic networks estimated with SNaQ for eight taxonomic subsets. a) Sub1: Pseudocrenilabrinae tribes; b) Sub2: WCA lineages; c) Sub3: Chromidotilapiini; d) Sub4: former-tilapiine tribes; e) Sub5: Barombi Mbo, Bermin and Natron/Magadi flocks, and riverine relatives; f) Sub6: EAR, former-tilapiine and other Tanganyikan lineages; g) Sub7: EAR clade; h) Sub8: Lamprologini and close relatives. Tribes are differentiated by numbers in square brackets adjacent to species names and also by color in the online version of this figure. Vertical lines to the right of phylogenies denote multitribal groupings (a–d and f–h) or species flocks (e). Gray numbers around nodes show bootstrap support for species relationships. Diagonal black lines connecting lineages show hybrid networks. Black and italicized numbers indicate bootstrap support and inheritance probabilities (i.e.,  $\gamma$  = proportion of genes transferred during hybridization) of estimated networks.

(Fig. 3g), and the H-Lineage ancestor and Lamprologini (Fig. 3g,h).

The earliest Haplochromini divergences gave rise to Malagarasi River *Orthochromis* and *Ctenochromis* from southern Tanzanian streams. Concatenated and species trees placed the remaining lineages into two clades. One included the Congolese *Pseudocrenilabrus*+*Orthochromis* as sister to a grouping of Congo/Zambezi serranochromines and Lake Fwa radiation. The other clade included Tanganyikan tropheines as sister to a group of riverine haplochromines and the Malawi and Victoria lake radiations. Phylogenetic networks placed

tropheines+serranochromines instead as sister to the Malawi/Victoria radiations (Fig. 3f,g). Despite our limited sampling of haplochromines, we identified possible hybridization between serranochromines and other Congolese taxa (Fig. 3f,g) and between tropheines and a Malawi/Victoria clade ancestor (Fig. 3g).

DISCUSSION

We applied a suite of approaches that draw on emerging high-throughput, bioinformatics, and phylogenomic tools to tackle the phylogenetic challenges of Pseudocrenilabrinae, a large clade with multiple



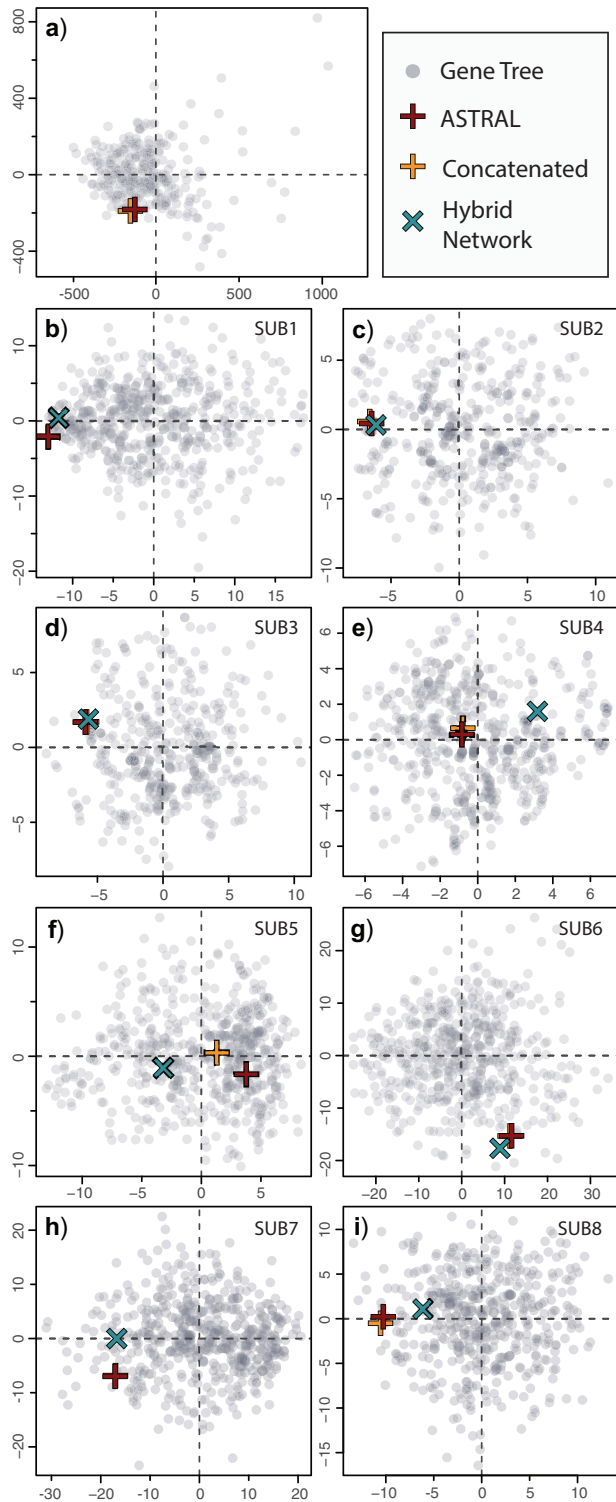

FIGURE 4. (Color online) Tree spaces comparing Pseudocrenilabrinae hypotheses across concatenated, species, hybrid network, and gene trees based on the tip-tip path difference metric. a) Comparison of full phylogeny across concatenated, species, and gene trees. b–i) Comparison of concatenated, species, hybrid network, and gene trees, restricted to taxa in hybrid network subsets. Tree spaces inferred with the Kendall–Colijn metric showed comparable similarity patterns across concatenated, species, and hybrid network trees and are thus included in Fig. S7 of Appendix S2 of the Supplementary material available on Dryad.

radiations and rampant gene tree conflict. Hundreds of carefully curated loci and phylogenomic methods that account for ILS, hybridization, and gene tree error ensured that relationships were informed by a comprehensive sampling of the diverse genetic histories and biological processes underlying cichlid evolutionary history, as well as possible methodological bias.

### Phylogenetic Relationships

We infer strong and generally consistent phylogenetic hypotheses for Pseudocrenilabrinae and its close relatives, especially at higher taxonomic levels. Support for homogeneous base composition and highly consistent species trees based on alternative input gene trees indicate that while gene tree error is inevitable (Mirarab and Warnow 2015), it is unlikely to have considerably misled phylogenetic reconstruction. Major taxonomic contributions of this work include the resolution of: (i) WCA intertribal relationships, (ii) the WCA sister to haplotilapiines, (iii) former-tilapiine relationships, (iv) relationships near the root of the EAR clade, and (v) placement of several challenging MVhL tribes. See Appendix S1 of the Supplementary material available on Dryad for a detailed taxonomic review.

WCA tribes diverged successively, with Hemichromini+Pelmatochromini supported as sister to the pan-African haplotilapiines. Previous, mostly multilocus, hypotheses for this part of the tree are either based on the incomplete sampling of WCA tribes or provide equivocal support for similar or conflicting relationships (Schwarzer et al. 2009; Dunz and Schliewen 2013; Matschiner et al. 2017; Irisarri et al. 2018). Haplotilapiines are frequently split into three clades: Oreochromini, west/central “boreotilapiines” (substrate spawning former-tilapiines less Tilapiini and Steatocranini), and central/east “austrotilapiines” (Tilapiini+Steatocranini+EAR) (Schwarzer et al. 2009; Dunz and Schliewen 2013; Matschiner et al. 2017). We fail to recover “boreotilapiines,” but our grouping of the notably intractable Tilapiini+Steatocranini (Schwarzer et al. 2009; Dunz and Schliewen 2013; Irisarri et al. 2018; Schedel et al. 2019) with the EAR clade in all but one network analysis (Fig. 3f) substantiates a more nested austrotilapiine assemblage. Within the EAR, we support a monophyletic Bathybatini+Boulengerochromini as sister to the MVhL clade, a finding consistent with some multilocus (e.g., Takahashi et al. 2001; Salzburger et al. 2002; Clabaut et al. 2005; Friedman et al. 2013) and most phylogenomic (Meyer et al. 2015; Takahashi and Sota 2016; Matschiner et al. 2017; Irisarri et al. 2018; Ronco et al. 2021) studies.

The H-lineage presents some of the most stubborn challenges of the Pseudocrenilabrinae backbone. While studies based on a small number of loci propose various, often poorly supported, topologies, phylogenomic efforts are converging on a few robust relationships (Takahashi and Sota 2016; Irisarri et al. 2018, Ronco et al. 2021). Common

phylogenomic groupings (also recovered here) are Ectodini+Limnochromini, Perissodini+Cyprichromini, and Eretmodini+Haplochromini. Eretmodini+Haplochromini corroborates an H-Lineage (Nishida 1991) over the alternative C-Lineage (Clabaut et al. 2005; Fig. 1a), which instead groups Eretmodini+Lamprologini.

Notable findings at shallower nodes include the first phylogenomic evidence for *Danakilia*+*Iranocichla* within Oreochromini (Trewavas 1983), a Heterotilapiini+Pelmatolapiini sister relationship, and monophyly of nested radiations beyond the Great Lakes. Combined evidence for monophyly (here, Stiassny et al. 1992; Schliewen et al. 1994; Roberts and Kullander 1994; Joyce et al. 2005; Ford et al. 2015, 2016; Martin et al. 2015; Musilova et al. 2019), short branches (Fig. S6 of the Supplementary material available on Dryad), and gene tree conflict (Figs. 2e and 4, Fig. S8 of the Supplementary material available on Dryad) for sampled flocks are consistent with repeated episodes of rapid speciation in diverse habitats.

Beyond Pseudocrenilabrinae, we corroborate the Pholidichthyidae+Cichlidae sister relationship (Wainwright et al. 2012) with amongst (Ghezelayagh et al. 2021) the largest phylogenomic data sets. The Cichlidae+Pholidichthyidae+Polycentridae grouping further sheds light on the biogeographic origin of cichlids (Friedman et al. 2013; Matschiner et al. 2017; Ghezelayagh et al. 2021). This grouping suggests freshwater origins for the clade with a secondary marine transition in Pholidichthyidae. Going forward, our documentation of genetic discordance at interfamilial nodes indicates that phylogenomic tools accounting for gene heterogeneity may help improve resolution within Blenniiformes (Hughes et al. 2018; Ghezelayagh et al. 2021).

### ILS and Hybridization

Complementary coalescent and network analyses support ILS and hybridization as likely sources of gene heterogeneity in African cichlids. Whereas hybridization is implicated in specific instances (Fig. 3), ILS appears to be a prevailing source of genetic incongruence throughout. Gene tree error is also expected to have contributed to genetic discordance.

Like authors before us, we document short branches (Fig. 2d, Fig. S6 of the Supplementary material available on Dryad) and gene heterogeneity (Figs. 2e and 4, Fig. S8 of the Supplementary material available on Dryad), consistent with rapid speciation and ILS, across the EAR and within smaller-scale lake radiations. Sampling of riverine taxa shows that these patterns are far from a unique property of lacustrine or recent taxa. Similar patterns within Congo species flocks, among chromidotilapiines, between WCA lineages and haplotilapiines, and among former-tilapiine tribes, indicate possible rapid diversification for recent riverine radiations and very early in Pseudocrenilabrinae history as well.

Phylogenetic networks document hybridization among taxa at various tree depths and from diverse

environments, some of which have presented persistent phylogenetic challenges. Disagreements regarding an H- versus C-Lineage and its internal relationships are likely influenced by hybridization. Most studies in favor of a C-Lineage are based on 50–100% mitochondrial markers (Kocher et al. 1995; Salzburger et al. 2002; Clabaut et al. 2005; Day et al. 2008; Schwarzer et al. 2009; Muschick et al. 2012; Dunz and Schliewen 2013; Weiss et al. 2015; Matschiner et al. 2017; but see Friedman et al. 2013), while the H-Lineage is supported by mainly nuclear data (here, Nishida 1991; Meyer et al. 2015; Takahashi and Sota 2016; Irisarri et al. 2018; Schedel et al. 2019; Ronco et al. 2021). We contribute additional phylogenomic evidence for gene flow within the H-Lineage and between it and early EAR and lamprologine taxa (Fig. 3a,f–h; Weiss et al. 2015; Meyer et al. 2017). Ectodini–Limnochromini hybridization (Fig. 3f,g) in particular seems to explain the grouping of these tribes in some analyses (Fig. 2e) and conflicting placements for Ectodini and Cyphotilapiini in prior work (Weiss et al. 2015; Takahashi and Sota 2016; Meyer et al. 2017; Irisarri et al. 2018; Schedel et al. 2019; Ronco et al. 2021).

Hybridization among riverine and between river and lake lineages is also implicated. Tilapiini+Steatocranini appear to be disposed to hybridization with other former-tilapiine and EAR taxa (Fig. 3a,d,f; Loh et al. 2013; Dunz and Schliewen 2013; Weiss et al. 2015; Irisarri et al. 2018). Such repeated and taxonomically far-reaching hybrid events may underlie disagreements regarding a Tilapiini+Steatocranini grouping and its relationship to the EAR (here, Schwarzer et al. 2009; Dunz and Schliewen 2013; Weiss et al. 2015; Irisarri et al. 2018; Schedel et al. 2019). Gene flow among WCA lineages (Fig. 3a–c) is a novel finding consistent with previous suspicions. Schwarzer et al. (2015) proposed hybridization as a source of cytonuclear discordance in Chromidotilapiini, which could have been aided by past hydrological connections between West Africa and the lower Congo. Inconsistent placements of *Iranocichla*+*Danakilia* (Fig. 2e; Schwarzer et al. 2009; Wagner et al. 2012; Matschiner et al. 2017; Schedel et al. 2019) may also be due to hybridization with other oreochromines (Fig. 3d,e). Finally, networks connecting lake flocks to riverine relatives (Fig. 3e–g) highlight a prospective role for river taxa as conduits of genetic material that could have supported nested lake radiations (Schwarzer et al. 2012a,b; Loh et al. 2013; Martin et al. 2015; Weiss et al. 2015; Ford et al. 2016).

Together, our findings corroborate mounting evidence for ILS and hybridization in the EAR clade (Takahashi et al. 2001; Salzburger et al. 2002; Koblmüller et al. 2007, 2010; Weiss et al. 2015; Meyer et al. 2017; Meier et al. 2017; Irisarri et al. 2018), small lacustrine species flocks (Schliewen and Klee 2004; Zaccara et al. 2014; Ford et al. 2015; Martin et al. 2015; Richards et al. 2018), and some riverine taxa (Schwarzer et al. 2011, 2012a,b; Loh et al. 2013; Alter et al. 2017) and also point to other lineages whose diversification may have been marked by these processes. The prevalence of these processes and resulting gene heterogeneity underscores

the importance of incorporating diverse genetic histories alongside approaches that consider multiple sources of discordance in phylogenies for taxa with complex evolutionary histories, like cichlids.

#### *Biogeographic and Macroevolutionary Implications*

Sequential early divergence of WCA lineages supports West/Central African rivers as the place of origin for Pseudocrenilabrinae (Stiassny 1987; Mayer et al. 1998). Several WCA and former-tilapiine tribes diversified *in situ* until austrotilapiines dispersed and radiated further east. Most age estimates place the origin of austrotilapiines somewhere between 25 and 35 Ma (Schwarzer et al. 2009; McMahan et al. 2013; Schedel et al. 2019; Matschiner 2019; Matschiner et al. 2020), which coincides with early rifting in East Africa (Ring 2014). Slightly older (Murray et al. 2001a; Schwarzer et al. 2009; Schedel et al. 2019) and substantially younger estimates (Friedman et al. 2013; Irisarri et al. 2018) still place the austrotilapiine split well within a time range that would see their earliest descendants impacted by rifting. As rift branches migrated across the continent, rivers changed course, drainages reversed, basin connectivity was altered, and lakes formed and desiccated (Stankiewicz and de Wit 2006; Danley et al. 2012). This was a dynamic time for aquatic ecosystems that may have afforded ancestral populations opportunities to colonize and diversify in new habitats further east (Murray et al. 2001a,b; Joyce et al. 2005; Ford et al. 2016).

Lake Tanganyika was most likely colonized by a Congo basin ancestor, based on its nested position among Congolese endemics. Later-diverging taxa recolonized surrounding rivers (e.g., *Lamprologus* and *Orthochromis*) and other eastern lakes. A close relationship between Lake Victoria and "*Astatotilapia*" suggest that the Malagarasi or Ruzizi rivers may have served as the portal through which the Victoria system was colonized (Danley et al. 2012). In addition to seeding lakes, changing river networks likely also facilitated the transfer of genetic diversity throughout the continent by allowing for hybridization among newly interacting communities (Schwarzer et al. 2012a,b; Loh et al. 2013; Martin et al. 2015; Weiss et al. 2015; Svardal et al. 2020).

Lake colonization resulted in repeated adaptive radiations that have been linked to both extrinsic factors related to ecological opportunity (e.g., depth and energy) and intrinsic attributes that enhance standing diversity or expedite speciation (e.g., proclivity for hybridization and sexual selection) (Deutsch 1997; Seehausen 2006; Wagner et al. 2012; Brawand et al. 2014; Weiss et al. 2015; Ford et al. 2016; Ivory et al. 2016; Meier et al. 2017; McGee et al. 2020). But, lakes are not the only habitats in which cichlids thrive. Although not as prolific, the Congo River, particularly its lower stretches, is another fecund environment for cichlids (Markert et al. 2010; Schwarzer et al. 2011; Alter et al. 2017; Stiassny and Alter 2021). Geographic and ecological drivers of riverine cichlid diversification are being investigated to various

degrees in the Neotropics (Piálek et al. 2012, 2019; Poll 1986; López-Fernández et al. 2013; Astudillo-Clavijo et al. 2015; Arbour and López-Fernández 2016; Burress et al. 2017); much less is known about diversification in African rivers (Markert et al. 2010; Schwarzer et al. 2011; Alter et al. 2017). Improved resolution of relationships will support comparative phylogenetic work in classic and understudied groups and enable comparisons of lineages and environments.

#### *Target Capture*

Target enrichment with taxon-specific probes allows researchers to obtain hundreds to thousands of loci chosen to meet known challenges of the focal group. However, mutation accumulation can affect data acquisition in distant relatives of the focal group (Chau et al. 2018). Indeed, effectiveness of Ilves and López-Fernández's (2014) tilapia-based probes decreases beyond African and Neotropical cichlids (Fig. S2 of the Supplementary material available on Dryad). Nevertheless, data loss may be ameliorated to some extent with bioinformatic modifications. Our hybrid approach proved capable of contributing novel sites through *de novo* assembly that are otherwise too divergent to map to a reference genome during guided assembly (Fig. S2 of the Supplementary material available on Dryad). Thus, our hybrid approach provides a tool for simultaneously reaping the benefits of a carefully curated data set for the focal group and placing it in a broader phylogenetic context with reduced missing data.

Given the advantages of protein-coding loci for phylogenetic inference, there is also a keen interest in identifying exon markers that are informative at broad phylogenetic scales (Li et al. 2013; Jiang et al. 2019). We identified close to 250 loci that are consistently retrieved across Blenniiformes (Table S5 of the Supplementary material available on Dryad) and may be suitable for investigating fish relationships beyond cichlids.

#### CONCLUSIONS

African cichlids have long captivated researchers with their species richness and ecomorphological diversity. Advances in molecular techniques are quickly building on the knowledge acquired from decades of meticulous morphological observation, and together this work is pulling back the curtain on a complex evolutionary history involving repeated radiations and hybridization that has played out over a dynamic continent. While genetic exchange and rapid diversification may have been important to the success of African cichlids, these processes also complicate phylogenetic inference. Thoroughly sampled phylogenetic hypotheses that account for gene heterogeneity from multiple sources will contribute to improved classification schemes and provide the necessary foundations for comparative research into drivers of cichlid diversity.



## SUPPLEMENTARY MATERIAL

Data available from the Dryad Digital Repository: <http://dx.doi.org/10.5061/dryad.d7wm37q26>. DNA sequences are also available from GenBank, BioProject PRJNA853788.

## FUNDING

This work was supported by the Royal Ontario Museum [ROM], the University of Michigan and Natural Sciences and Engineering Research Council of Canada [NSERC] Discovery Grants [371212-2009 and 2014-05374 to H.L.F.]; NSERC Postgraduate/Alexander Graham Bell Canada Graduate Scholarship [3-475436-2015 to V.A.C.]; ROM Rebanks Postdoctoral Fellowship and Canadian Museum of Nature Research Activity Grant to K.L.I.; (American Museum of Natural History [AMNH]) Axelrod Research Curatorship and US National Science Foundation [NSF] [DEB 1655694 to M.L.J.S.]; Czech Science Foundation [16-09784Y] and Swiss National Science Foundation [SNSF] [166550 to Z.M.], European Research Council [ERC] (CICHLID~X) and SNSF [156405 and 176039 to W.S.].

## ACKNOWLEDGMENTS

For curatorial assistance and laboratory support, we thank Mary Burrige, Margaret Zur, and Erling Holm (ROM); Tom Vigliotta, Radford Arrindell, Chloe Lewis, and Barbara Brown (AMNH), and Fabrizia Ronco and Adrian Indermaur (University of Basel). Samples not available at the ROM, AMNH, or University of Basel were provided by Oliver Lucanus (Belowwater.com). We gratefully acknowledge the field participation and support of Victor Mamonekenei and Armel Ibala (Université Marien Ngouabi, Republic of Congo); Raoul Monsembula Iyaba, José Justin Mbimbi Mayi Munene, Tobit Liyandja and Myriam Modima Yoko (Université de Kinshasa, Democratic Republic of Congo); Lawrence Makasa and Taylor Banda (Department of Fisheries, Mpulungu, Zambia); Arnold Roger Bitja-Nyom (University of Douala, Cameroon); Antoine Pariselle; Cyrille Dening; and Ngando Ephesians Jiku. For granting us permission to do research in their locations and their assistance with collection and exportation permitting, we thank the Ministère de la Recherche Scientifique et de l'Innovation Technique, Institut National de Recherche EnSciences Exactes et Naturelles (IRSEN) and Groupe d'Etude et de Recherche sur la Diversité Biologique (GERBID) (Republic of Congo); Ministère de l'Agriculture et du Développement Rural, Secrétariat Général de l'Agriculture, Pêche et Elevage, Direction des Pêches and the Université de Kinshasa, Cabinet du Recteur (Democratic Republic of Congo); local authorities of the Bemé and Barombi villages (Cameroon); and the Ministry of Scientific Research and Innovation (Cameroon).

## REFERENCES

- Abadi S., Azouri D., Pupko T., Mayrose I. 2019. Model selection may not be a mandatory step for phylogeny reconstruction. *Nat. Commun.* 10:934.
- Alter S., Munshi-South J., Stiasny M.L.J. 2017. Genomewide SNP data reveal cryptic phylogeographic structure and microallopatric divergence in a rapids-adapted clade of cichlids from the Congo River. *Mol. Ecol.* 26:1401–1419.
- Altschul S.F., Gish W., Miller W., Myers E.W., Lipman D.J. 1990. Basic local alignment search tool. *J. Mol. Biol.* 215:403–410.
- Arbour J.H., López-Fernández H. 2016. Continental cichlid radiations: functional diversity reveals the role of changing ecological opportunity in the Neotropics. *Proc. Biol. Sci.* 283:20160556.
- Astudillo-Clavijo V., Arbour J.H., López-Fernández H. 2015. Selection towards different adaptive optima drove the early diversification of locomotor phenotypes in the radiation of Neotropical geophagine cichlids. *BMC Evol. Biol.* 15:77.
- Betancur-R R., Broughton R.E., Wiley E.O., Carpenter K., López J.A., Li C., Holcroft N.I., Arcila D., Sanciangco M., Cureton li J.C., Zhang F., Buser T., Campbell M.A., Ballesteros J.A., Roa-Varon A., Willis S., Borden W.C., Rowley T., Reneau P.C., Hough D.J., Lu G., Grande T., Arratia G., Ortí G. 2013. The tree of life and a new classification of bony fishes. *PLoS Curr.* 18:ecur-rents.tol.53ba26640df0ccae755b165c8c26288.
- Betancur-R R., Wiley E.O., Arratia G., Acero A., Bailly N., Miya M., Lecointre G., Ortí G. 2017. Phylogenetic classification of bony fishes. *BMC Evol. Biol.* 17:162.
- Bezanson J., Edelman A., Karpinski S., Shah V.B. 2017. Julia: a fresh approach to numerical computing. *SIAM Review* 59:65–98.
- Brawand D., Wagner C.E., Li Y.L., Malinsky M., Keller I., Fan S., Simakov O., Ng A.Y., Lim Z.W., Bezault E., Turner-Maier J., Johnson J., Alcazar R., Noh H.J., Russell P., Aken B., Alföldi J., Amemiya C., Azzouzi N., Baroiller J.F., Barloy-Hubler R., Berlin A., Bloomquist R., Carleton K.L., Conte M.A., D'Cotta H., Eshel O., Gaffney L., Galibert F., Gante H.F., Gnerre S., Greuter L., Guyon R., Haddad N.S., Haerty W., Harris R.M., Hofmann H.A., Hourlier R., Hulata G., Jaffe D.B., Lara M., Lee A.P., MacCallum I., Mwaiko S., Nikaido M., Nishihara H., Ozouf-Costaz C., Penman D.J., Przybylski D., Rakotomanga M., Renn S.C.P., Ribeiro F.J., Ron M., Salzburger W., Sanchez-Pulido L., Santos M.E., Searle S., Sharpe T., Swofford R., Tan F.J., Williams L., Young S., Yin S., Okada N., Kocher T.D., Miska E.A., Lander E.S., Venkatesh B., Fernald R.D., Meyer A., Ponting C.P., Streebman J.T., Lindblad-Toh K., Seehausen O., Di Palma F. 2014. The genomic substrate for adaptive radiation in African cichlid fish. *Nature* 513:375–381.
- Burruss E.D., Piálek L., Casciotta J.R., Almirón A., Tan M., Armbruster J.W., Ričan O. 2017. Island- and lake-like parallel adaptive radiations replicated in rivers. *Proc. R. Soc. B* 285:20171762.
- Cai L., Xi Z., Lemmon E.M., Lemmon A.R., Mast A., Buddenhagen C.E. 2021. The perfect storm: gene tree estimation error, incomplete lineage sorting, and ancient gene flow explain the most recalcitrant ancient angiosperm clade, Malpighiales. *Syst. Biol.* 70:491–507.
- Chau J.H., Rahfeldt W.A., Olmstead R.G. 2018. Comparison of taxon-specific versus general locus sets for targeted sequence capture in plant phylogenomics. *Appl. Plant Sci.* 6:e1032.
- Clabaut C., Salzburger W., Meyer A. 2005. Comparative phylogenetic analyses of the adaptive radiation of Lake Tanganyika cichlid fish: nuclear sequences are less homoplasious but also less informative than mitochondrial DNA. *J. Mol. Evol.* 61:666–681.
- Clark K., Karsch-Mizrachi I., Lipman D.J., Ostell J., Sayers E.W. 2016. GenBank. *Nucleic Acids Res.* 44:D67–D72.
- Cock P.A., Antao T., Chang J.T., Chapman B.A., Cox C.J., Dalke A., Friedberg I., Hamelryck T., Kauff F., Wilczynski B., de Hoon M.J.L. 2009. Biopython: freely available Python tools for computational molecular biology and bioinformatics. *Bioinformatics* 25:1422–1423.
- Crawford J. 2010. AssemblyAssembler1.3. GitHub repository: <https://github.com/dzerbino/velvet/tree/master/contrib/AssemblyAssembler1.3>.
- Danley P.D., Husemann M., Ding B., DiPietro L.M., Beverly E.J., Peppe D.J. 2012. The impact of the geologic history and paleoclimate on the diversification of East African Cichlids. *Int. J. Evol. Biol.* 2012:574851–20.

- Davidson R., Vachaspati P., Mirarab S., Warnow T. 2015. Phylogenomic species tree estimation in the presence of incomplete lineage sorting and horizontal gene transfer. *BMC Genomics* 16:51.
- Day J.J., Cotton J.A., Barraclough T.G. 2008. Tempo and mode of diversification of Lake Tanganyika cichlids. *PLoS One* 3: doi: 10.1371/journal.pone.0001730.
- Degnan J.H., Rosenberg N.A. 2009. Gene tree discordance, phylogenetic inference and the multispecies coalescent. *Trends Ecol. Evol.* 24:332–340.
- Deutsch J.C. 1997. Colour diversification in Malawi cichlids: evidence for adaptation, reinforcement or sexual selection? *Biol. J. Linn. Soc.* 62:1–14.
- Dunz A.R., Schlieven U.K. 2013. Molecular phylogeny and revised classification of the haplotilapiine cichlid fishes. *Mol. Phylogenet. Evol.* 68:64–80.
- Edgar R.C. 2004. MUSCLE: multiple sequence alignment with high accuracy and high throughput. *Nucleic Acids Res.* 32:1792–1797.
- Edwards S.V. 2009. Is a new and general theory of molecular systematics emerging? *Evolution* 63:1–19.
- Eytan R.I., Evans B.R., Dornburg A., Lemmon A.R., Lemmon E.M., Wainwright P.C., Near T.J. 2015. Are 100 enough? Inferring acanthomorph teleost phylogeny using Anchored Hybrid Enrichment. *BMC Evol. Biol.* 15:113.
- Farias I.P., Ortí G., Meyer A. 2000. Total evidence: molecules, morphology, and the phylogenetics of cichlid fishes. *J. Exp. Zool. B* 288:76–92.
- Farias I.P., Ortí G., Sampaio I., Schneider H., Meyer A. 1999. Mitochondrial DNA phylogeny of the family Cichlidae: monophyly and fast molecular evolution of the Neotropical assemblage. *J. Mol. Evol.* 48:703–711.
- Faircloth B.C., McCormack J.E., Crawford N.G., Harvey M.G., Brumfield R.T., Glenn T.C. 2012. Ultraconserved elements anchor thousands of genetic markers spanning multiple evolutionary timescales. *Syst. Biol.* 61:717–726.
- Felsenstein J. 1978. Cases in which parsimony or compatibility methods will be positively misleading. *Syst. Zool.* 27:401–410.
- Flicek P., Ahmed I., Amode M.R., Barrell D., Beal K., Brent S., Carvalho-Silva D., Clapham P., Coates G., Fairley S., Fitzgerald S., Gil L., García-Girón C., Gordon L., Hourlier T., Hunt S., Juettemann T., Kähäri A.K., Keenan S., Komorowska M., Kulesha E., Longden I., Maurel T., McLaren W.M., Muffato M., Nag R., Overduin B., Pignatelli M., Pritchard B., Pritchard E., Riat H.S., Ritchie G.R., Ruffier M., Schuster M., Sheppard D., Sobral D., Taylor K., Thorburn A., Trevanion S., White S., Wilder S.P., Aken B.L., Birney E., Cunningham F., Dunham I., Harrow J., Herrero J., Hubbard T.J., Johnson N., Kinsella R., Parker A., Spudich G., Yates A., Zadissa A., Searle S.M. 2013. Ensembl 2013. *Nucleic Acids Res.* 41:D48–D55.
- Foster P.G. 2004. Modeling compositional heterogeneity. *Syst. Biol.* 53:485–495.
- Ford A.G.P., Bullen T.R., Pang L., Genner M.J., Bills R., Flouri T., Ngatunga B.P., Rüber L., Schlieven U.K., Seehausen O., Shechonge A., Stiassny M.L.J., Turner G.F., Day J.J. 2019. Molecular phylogeny of Oreochromis (Cichlidae: Oreochromini) reveals mito-nuclear discordance and multiple colonisation of adverse aquatic environments. *Mol. Phylogenet. Evol.* 136:215–226.
- Ford A.G.P., Dasmahapatra K.K., Rüber L., Gharbi K., Cezard T., Day J.J. 2015. High levels of interspecific gene flow in an endemic cichlid fish adaptive radiation from an extreme lake environment. *Mol. Ecol.* 24:3421–3440.
- Ford A.G.P., Rüber L., Newton J., Dasmahapatra K.K., Balarin J.D., Brunn K., Day J.J. 2016. Niche divergence facilitated by fine-scale ecological partitioning in a recent cichlid fish adaptive radiation. *Evolution* 70:2718–2735.
- Friedman M., Keck B.P., Dornburg A., Eytan R.I., Martin C.H., Hulsey C.D., Wainwright P.C., Near T.J. 2013. Molecular and fossil evidence place the origin of cichlid fishes long after Gondwanan rifting. *Proc. R. Soc. B.* 280:20131733.
- Froese R., Pauly D. 2021. Fishbase. [www.fishbase.org](http://www.fishbase.org)
- Gatesy J., Springer M.S. 2014. Phylogenetic analysis at deep timescales: unreliable gene trees, bypassed hidden support, and the coalescence/concatalence conundrum. *Mol. Phylogenet. Evol.* 80:231–266.
- Genner M.J., Seehausen O., Lunt D.H., Joyce D.A., Shaw P.W., Carvalho R., Turner G.F. 2007. Age of cichlids: new dates for ancient lake fish radiations. *Mol. Biol. Evol.* 24:1269–1282.
- Ghezelayagh A., Harrington R.C., Burress E.D., Campbell M.A., Buckner J.C., Chakrabarty P., Glass J.R., McCraney W.T., Unmack P.J., Thacker C.E., Alfaro M.E., Friedman S.T., Ludt W.B., Cowman P.F., Friedman M., Price S.A., Dornburg A., Faircloth B.C., Wainwright P.C., Near T.J. 2021. Prolonged morphological expansion of spiny-rayed fishes following the end-Cretaceous. *bioRxiv* 2021.07.12.452083. doi: 10.1101/2021.07.12.452083.
- Grant P.P.R., Grant R. 2019. Hybridization increases population variation during adapting radiation. *Proc. Natl. Acad. Sci. USA* 116:23216–23224.
- Hughes L.C., Ortí G., Huang Y., Sun Y., Baldwin C.C., Thompson A.W., Arcila D., Betancur-R R., Li C., Becker L., Bellora N., Zhao X., Li X., Wang M., Fang C., Xie B., Zhou Z., Huang H., Chen S., Venkatesh B., Shi Q. 2018. Comprehensive phylogeny of ray-finned fishes (Actinopterygii) based on transcriptomic and genomic data. *Proc. Natl. Acad. Sci. USA* 115:6249–6254.
- Hulsey C.D., García de León F. 2005. Cichlid jaw mechanics: linking morphology to feeding specialization. *Funct. Ecol.* 19:487–494.
- Ilves K.L., López-Fernández H. 2014. A targeted next-generation sequencing toolkit for exon-based cichlid phylogenomics. *Mol. Ecol. Resour.* 14:802–811.
- Ilves K.L., Torti D., López-Fernández H. 2018. Exon-based phylogenomics strengthens the phylogeny of Neotropical cichlids and identifies remaining conflicting clades (Cichliformes: Cichlidae: Cichlinae). *Mol. Phylogenet. Evol.* 118:232–243.
- Irisarri I., Singh P., Koblmüller S., Torres-Dowdall J., Henning F., Franchini P., Fischer C., Lemmon A.R., Lemmon E.M., Thallinger G.G., Sturmbauer C., Meyer A. 2018. Phylogenomics uncovers early hybridization and adaptive loci shaping the radiation of Lake Tanganyika cichlid fishes. *Nat. Commun.* 9:3159–12.
- Ivory S.J., Blome M.W., King J.W., McGlue M.M., Cole J.E., Cohen A.S. 2016. Environmental change explains cichlid adaptive radiation at Lake Malawi over the past 1.2 million year. *Proc. Natl. Acad. Sci. USA* 113:11895–11900.
- Jarvis E.D., Mirarab S., Aberer A.J., Li B., Houde P., Li C., Ho S.Y.W., Faircloth B.C., Nabholz B., Howard J.T., Suh A., Weber C.C., da Fonseca R.R., Li J., Zhang F., Li H., Zhou L., Narula N., Liu L., Ganapathy G., Boussau B., Bayzid M.S., Zavidovych V., Subramanian S., Gabaldón T., Capella-Gutiérrez S., Huerta-Cepas J., Rekepalli B., Munch K., Schierup M., Lindow B., Warren W.C., Ray D., Green R.E., Bruford M.W., Zhan X., Dixon A., Li S., Li N., Huang Y., Derryberry E.P., Bertelsen M.F., Sheldon F.H., Brumfield R.T., Mello C.V., Lovell P.V., Wirthlin M., Schneider M.P.C., Prosdocimi F., Samaniego J.A., Velazquez A.M.V., Alfaro-Núñez A., Campos P.F., Petersen B., Sicheritz-Ponten T., Pas A., Bailey T., Scofield P., Bunce M., Lambert D.M., Zhou Q., Perelman P., Driskell A.C., Shapiro B., Xiong Z., Zeng Y., Liu S., Li Z., Liu B., Wu K., Xiao J., Yin X., Zheng Q., Zhang Y., Yang H., Wang J., Smeds L., Rheindt F.E., Braun M., Fjeldsa J., Orlando L., Barker F.K., Jonsson K., Johnson W., Koepfli K.P., O'Brien S., Haussler D., Ryder O.A., Rahbek C., Willerslev E., Graves G.R., Glenn T.C., McCormack J., Burt D., Ellegren H., Alström P., Edwards S.V., Stamatakis A., Mindell D.P., Cracraft J., Braun E.L., Warnow T., Jun W., Gilbert M.T.P., Zhang G. 2014. Whole-genome analyses resolve early branches in the tree of life of modern birds. *Science* 346:1320–1331.
- Jiang W., Chen S.Y., Wang H., Li D.Z., Wiens J.J. 2014. Should genes with missing data be excluded from phylogenetic analyses? *Mol. Phylogenet. Evol.* 80:308–318.
- Jiang J., Yuan H., Zheng X., Wang Q., Kuang T., Li J., Liu J., Song S., Wang S., Cheng F., Li H., Huang J., Li C. 2019. Gene markers for exon capture and phylogenomics in ray-finned fishes. *Ecol. Evol.* 9:3973–3983.
- Jombart T., Kendall M., Almagro-García J., Colijn C. 2017. treespace: statistical exploration of landscapes of phylogenetic trees. *Mol. Ecol. Resour.* 17:1385–1392.
- Joyce D.A., Lunt D.H., Bills R., Turner G.F., Katongo C., Duftner N., Sturmbauer C., Seehausen O. 2005. An extant cichlid fish radiation emerged in an extinct Pleistocene Lake. *Nature* 435:90–95.

- Kearse M., Moir R., Wilson A., Stones-Havas S., Cheung M., Sturrock S., Buxton S., Cooper A., Markowitz S., Duran C., Thierer T., Ashton B., Meintjes P., Drummond A. 2012. Geneious basic: an integrated and extendable desktop software platform for the organization and analysis of sequence data. *Bioinformatics* 28:1647–1649.
- Keck B.P., Hulsey C.D. 2014. Continental monophyly of cichlid fishes and the phylogenetic position of *Heterochromis multidentis*. *Mol. Phylogenet. Evol.* 73:53–59.
- Kendall M., Colijn C. 2016. Mapping phylogenetic trees to reveal distinct patterns of evolution. *Mol. Biol. Evol.* 33:2735–2743.
- Koblmüller S., Duftner N., Sefc K.M., Aibara M., Stipacek M., Blanc M., Egger B., Sturmbauer C. 2007. Reticulate phylogeny of gastropod-shell-breeding cichlids from Lake Tanganyika – the result of repeated introgressive hybridization. *BMC Evol. Biol.* 7:7.
- Koblmüller S., Egger B., Sturmbauer C., Sefc K.M. 2010. Rapid radiation, ancient incomplete lineage sorting and ancient hybridization in the endemic Lake Tanganyika cichlid tribe Tropheini. *Mol. Phylogenet. Evol.* 55:318–334.
- Kocher T., Conroy J.A., McKaye K.R., Stauffer J.R., Lockwood S.F. 1995. Evolution of NADH Dehydrogenase Subunit 2 in East African cichlid fish. *Mol. Phylogenet. Evol.* 4:420–432.
- Kocher T. 2004. Adaptive evolution and explosive speciation: the cichlid fish model. *Nat. Rev. Genet.* 5:288–298.
- Kubatko L.S. 2009. Identifying hybridization events in the presence of coalescence via model selection. *Syst. Biol.* 58:478–488.
- Kubatko L.S., Degnan J.H. 2007. Inconsistency of phylogenetic estimates from concatenated data under coalescence. *Syst. Biol.* 56:17–24.
- Kubatko L.S., Carstens B.C., Knowles L.L. 2009. STEM: species tree estimation using maximum likelihood for gene trees under coalescence. *Bioinformatics* 25:971–973.
- Lanfear R., Calcott B., Ho S.Y.W., Guindon S. 2012. PartitionFinder: combined selection of partitioning schemes and substitution models for phylogenetic analyses. *Mol. Biol. Evol.* 29:1695–1701.
- Langmead B., Salzberg S. 2012. Fast gapped-read alignment with Bowtie2. *Nat. Methods* 9:357–359.
- Lemmon A.R., Emme S.A., Lemmon E.M. 2012. Anchored hybrid enrichment for massively high-throughput phylogenomics. *Syst. Biol.* 61:727–744.
- Li C., Hofreiter M., Straube N., Corrigan S., Naylor G.J.P. 2013. Capturing protein-coding genes across highly divergent species. *Biotechniques* 54:321–326.
- Li H. 2013. Aligning sequence reads, clone sequences and assembly contigs with BWA-MEM. *arXiv* 1303.3997v2 doi: 10.48550/arXiv.1303.3997.
- Li H., Durbin R. 2009. Fast and accurate short read alignment with Burrows–Wheeler transform. *Bioinformatics* 25:1754–1760.
- Li H., Handsaker B., Wysoker A., Fennell T., Ruan J., Homer N., Marth G., Abecasis G., Durbin R., 1000 Genome Project Data Processing Subgroup. 2009. The sequence alignment/map (SAM) format and SAMtools. *Bioinformatics* 25:2078–2079.
- Litsios G., Salamin N. 2014. Hybridisation and diversification in the adaptive radiation of clownfishes. *BMC Evol. Biol.* 14:245.
- Liu L., Wu S., Yu L. 2015. Coalescent methods for estimating species trees from phylogenomic data. *J. Syst. Evol.* 53:380–390.
- Loh Y.-H.E., Bezault E., Muenzel F.M., Roberts R.B., Swofford R., Barluenga M., Kidd C.E., Howe A.E., Di Palma F., Linbald-Toh K., Hey J., Seehausen O., Salzburger W., Kocher T.D., Streelman J.T. 2013. Origins of shared genetic variation in African cichlids. *Mol. Biol. Evol.* 30:906–917.
- López-Fernández H., Arbour J.H., Winemiller K.O., Honeycutt R.L. 2013. Testing for ancient adaptive radiations in Neotropical cichlid fishes. *Evolution* 67:1321–1337.
- Maddison W.P. 1997. Gene trees in species trees. *Syst. Biol.* 46:523–536.
- Maglott D., Ostell J., Pruitt K.D., Tatusova T. 2005. Entrez Gene: gene-centered information at NCBI. *Nucleic Acids Res.* 33:D52–D57.
- Malinsky M., Svardal H., Tyers A.M., Miska E.A., Genner M.J., Turner G.F., Durbin R. 2018. Whole-genome sequences of Malawi cichlids reveal multiple radiations interconnected by gene flow. *Nat. Ecol. Evol.* 2:1940–1955.
- Markert J.A., Schelly R.C., Stiassny M.L.J. 2010. Genetic isolation and morphological divergence mediated by high-energy rapids in two cichlid genera from the lower Congo rapids. *BMC Evol. Biol.* 10:149.
- Martin C.H., Cutler J.S., Friel J.P., Denning Touokong C., Coop G., Wainwright P.C. 2015. Complex histories of repeated gene flow in Cameroon crater lake cichlids cast doubt on one of the clearest examples of sympatric speciation. *Evolution* 69:1406–1422.
- Matschiner M. 2019. Gondwanan vicariance or trans-Atlantic dispersal of cichlid fishes. A review of the molecular evidence. *Hydrobiologia* 832:9–37.
- Matschiner M., Böhne A., Ronco F., Salzburger W. 2020. The genomic timeline of cichlid fish diversification across continents. *Nat. Commun.* 11:5895.
- Matschiner M., Musilová Z., Barth J.M.I., Starostová Z., Salzburger W., Steel M., Bouckaert R. 2017. Bayesian phylogenetic estimation of clade ages supports Trans-Atlantic dispersal of cichlid fishes. *Syst. Biol.* 66:3–22.
- Mayer W.E., Tichy H., Klein J. 1998. Phylogeny of African cichlid fishes as revealed by molecular markers. *Hereditas* 80:702–714.
- McGee M.D., Borstein S.R., Meier J.L., Marques D.A., Mwaiko S., Taabu A., Kishe M.A., O’Meara B., Bruggmann R., Excoffier L., Seehausen O. 2020. The ecological and genomic basis of explosive adaptive radiation. *Nature* 586:75–59.
- McMahan C.D., Chakrabarty P., Sparks J.S., Smith W.L., Davis M.P. 2013. Temporal patterns of diversification across global cichlid biodiversity (Acanthomorpha: Cichlidae). *PLoS One* 8:e71162.
- Minh B.Q., Hahn M.W., Lanfear R. 2020a. New methods to calculate concordance factors for phylogenomic datasets. *Mol. Biol. Evol.* 37:2727–2733.
- Minh B.Q., Schmidt H.A., Chernomor O., Schrempf D., Woodhams M.D., von Haeseler A., Lanfear R. 2020b. IQ-TREE 2: new models and efficient methods for phylogenetic inference in the genomic era. *Mol. Biol. Evol.* 37:1530–1534.
- Meier J.L., Marques D.A., Mwaiko S., Wagner C.E., Excoffier L., Seehausen O. 2017. Ancient hybridization fuels rapid cichlid fish adaptive radiations. *Nat. Commun.* 8:14363.
- Meng C., Kubatko L.S. 2009. Detecting hybrid speciation in the presence of incomplete lineage sorting using gene tree incongruence: a model. *Theor. Popul. Biol.* 75:35–45.
- Meyer B.S., Matschiner M., Salzburger W. 2015. A tribal level phylogeny of Lake Tanganyika fishes based on a genomic multi-marker approach. *Mol. Phylogenet. Evol.* 83:56–71.
- Meyer B.S., Matschiner M., Salzburger W. 2017. Disentangling incomplete lineage sorting and introgression to refine species-tree estimates for Lake Tanganyika cichlid fishes. *Syst. Biol.* 66:531–550.
- Miller M.R., Dunham J.P., Amores A., Cresko W.A., Johnson E.A. 2007. Rapid and cost-effective polymorphism identification and genotyping using restriction site associated NDA (RAD) markers. *Genome Res.* 17:240–248.
- Miller M.A., Pfliffer W., Schwartz T. 2010. Creating the CIPRES Science Gateway for inference of large phylogenetic trees. *Proceedings of the Gateway Computing Environments Workshop (GCE)*, New Orleans, LA. p. 1–8.
- Mirarab S., Warnow T. 2015. ASTRAL-II: coalescent-based species tree estimation with many hundreds of taxa and thousands of genes. *Bioinformatics* 31:i44–i52.
- Mirarab S., Bayzid M.S., Warnow T. 2016. Evaluating summary methods for multilocus species tree estimation in the presence of incomplete lineage sorting. *Syst. Biol.* 65:366–380.
- Morales-Briones D.F., Kadereit G., Tefarikis D.T., Moore M.J., Smith S.A., Brockington S.F., Timoneda A., Yim W.C., Cushman J.C., Yang Y. 2021. Disentangling sources of gene tree discordance in phylogenomic data sets: testing ancient hybridizations in *Amaranthaceae* s.l. *Syst. Biol.* 70:219–235.
- Murphy W.J., Pringle T.H., Crider T.A., Springer M.S., Miller W. 2007. Using genomic data to unravel the root of the placental mammal phylogeny. *Genome Res.* 17:413–421.
- Murray A.M. 2001a. The fossil record and biogeography of the Cichlidae (Actinopterygii: Labroidae). *Biol. J. Linn. Soc.* 74:517–532.
- Murray A.M. 2001b. Eocene cichlid fishes from Tanzania, East Africa. *J. Verteb. Paleontol.* 20:651–664.
- Muschick M., Indermaur A., Salzburger W. 2012. Convergent evolution within an adaptive radiation of cichlid fishes. *Curr. Biol.* 22:2362–2368.



- Musilova Z., Indermaur A., Bitja-Nyom A.R., Omelchenko D., Klodawska M., Albergati L., Remišová K., Salzburger W. 2019. Evolution of the visual sensory system in cichlid fishes from crater lake Barombi Mbo in Cameroon. *Mol. Ecol.* 28:5010–5031.
- Near T.J., Dornburg A., Eytana R.I., Keck B.P., Smith W.L., Kuhn K.L., Moore J.A., Price S.A., Burbrink F.T., Friedman M., Wainwright P.C. 2013. Phylogeny and tempo of diversification in the superradiation of spiny-rayed fishes. *Proc. Natl. Acad. Sci. USA* 110:12738–12743.
- Nishida M. 1991. Lake Tanganyika as an evolutionary reservoir of old lineages of East African cichlid fishes: inferences from allozyme data. *Experientia* 47:974–979.
- Nguyen L.-T., Schmidt H.A., von Haeseler A., Minh B.Q. IQ-TREE: a fast and effective stochastic algorithm for estimating maximum-likelihood phylogenies. *Mol. Biol. Evol.* 32:268–274.
- Nute M., Chou J., Molloy E.K., Warnow T. 2018. The performance of coalescent-based species tree estimation methods under models of missing data. *BMC Genomics* 19:133.
- Paradis E., Schliep K. 2019. ape 5.0: an environment for modern phylogenetics and evolutionary analyses in R. *Bioinformatics* 35:526–528.
- Piálek L., Burrell E., Dragová K., Almirón A., Casciotta J., Řičan O. 2019. Phylogenomics of pike cichlids. (Cichlidae: *Crenicichla*) of the *C. manderlburgeri* species complex: rapid ecological speciation in the Iguzú River basin. *Hydrobiologia* 832:355–375.
- Piálek L., Řičan O., Casciotta J., Almirón A., Zrzavý. 2012. Multilocus phylogeny of *Crenicichla* (Teleostei: Cichlidae), with biogeography of the *C. lacustris* group: species flocks as a model for sympatric speciation in rivers. *Mol. Phylogenet. Evol.* 62:46–61.
- Poll M. 1986. Classification des Cichlidae du lac Tanganyika. Tribus, genres et espèces. *Acad. R. Belgium Mem. Classe Sci.* 45:1–163.
- R Core Team. 2015. R: a language and environment for statistical computing. Vienna, Austria: R Foundation for Statistical Computing. <http://www.R-project.org/>.
- Richards E.J., Poelstra J.W., Martin C.H. 2018. Don't throw out the sympatric speciation with the crater lake water: fine-scale investigation of introgression provides equivocal support for causal role of secondary gene flow in one of the clearest examples of sympatric speciation. *Evol. Lett.* 2:524–540.
- Ring U. 2014. The East African Rift System. *Aust. J. Earth. Sci.* 107:132–146.
- Roberts T., Kullander S.O. 1994. Endemic cichlid fishes of the Fwa River, Zaire: Systematics and ecology. *Ichthyol. Explor. Fres.* 2:97–154.
- Robinson D.R., Foulds L.R. 1981. Comparison of phylogenetic trees. *Math. Biosci.* 53:131–147.
- Roch S., Steel M. 2015. Likelihood-based tree reconstruction on a concatenation of aligned sequence data sets can be statistically inconsistent. *Theor. Popul. Biol.* 100C:56–62.
- Roch S., Warnow T. 2015. On the robustness to gene tree estimation error (or lack thereof) of coalescent-based species tree methods. *Syst. Biol.* 64:663–676.
- Ronco F., Matschiner M., Böhne A., Boila A., Büscher H.H., El Taher A., Indermaur A., Malinsky M., Ricci V., Kahem A., Jentoft S., Salzburger W. 2021. Drivers and dynamics of a massive adaptive radiation in cichlid fishes. *Nature* 589:76–81.
- Salzburger W. 2018. Understanding explosive diversification through cichlid fish genomics. *Nat. Rev. Genet.* 19:705–717.
- Salzburger W., Mack T., Verheyen E., Meyer A. 2005. Out of Tanganyika: Genesis, explosive speciation, key-innovations and phylogeography of the haplochromine cichlid fishes. *BMC Evol. Biol.* 5:17.
- Salzburger W., Meyer A., Maric S., Verheyen E., Sturmbauer C. 2002. Phylogeny of the Lake Tanganyika cichlid species flock and its relationship to the central and East African haplochromine cichlid fish faunas. *Syst. Biol.* 51:113–135.
- Schedel F.D.B., Musilova Z., Schliewen U.K. 2019. East African cichlid lineages (Teleostei: Cichlidae) might be older than their ancient host lakes: new divergence estimates for the east African cichlid radiation. *BMC Evol. Biol.* 19:94.
- Schliep K. 2011. phangorn: phylogenetic analysis in R. *Bioinformatics* 27:592–593.
- Schliewen U.K., Klee B. 2004. Reticulate sympatric speciation in Cameroonian crater lake cichlids. *Front. Zool.* 41:5.
- Schliewen U.K., Stiassny M.L.J. 2003. *Etia nguti*, a new genus and species of cichlid fish from the River Mamfue, Upper Cross River basin, Cameroon, Central Africa. *Ichthyol. Explor. Fres.* 14:61–72.
- Schliewen U.K., Tautz D., Pääbo S. 1994. Sympatric speciation suggested by monophyly of crater lake cichlids. *Nature* 368:629–632.
- Schmieder R., Edwards R. 2011. Quality control and preprocessing of metagenomic datasets. *Bioinformatics* 27:863–864.
- Schwarzer J., Lamboj A., Langen K., Misof B., Schliewen U.K. 2015. Phylogeny and age of chromidotilapiini cichlids (Teleostei: Cichlidae). *Hydrobiologia* 748:185–199.
- Schwarzer J., Misof B., Ifuta S.N., Schliewen U.K. 2011. Time and origin of cichlid colonization of the lower Congo rapids. *PLoS One* 6:e2380.
- Schwarzer J., Misof B., Schliewen U.K. 2012a. Speciation within genomic networks: a case study based on *Steatocranus* cichlids of the lower Congo rapids. *J. Evol. Biol.* 25:138–148.
- Schwarzer J., Misof B., Tautz D., Schliewen U.K. 2009. The root of the East African cichlid radiations. *BMC Evol. Biol.* 9:186.
- Schwarzer J., Swartz E.R., Vreven E., Snoeks S.M., Cotterill F.P.D., Misof B., Schliewen U.K. 2012b. Repeated trans-watershed hybridization among haplochromine cichlids (Cichlidae) was triggered by Neogene landscape evolution. *Proc. R. Soc.* 279:4389–4398.
- Seehausen O. 2006. African cichlid fish: a model system in adaptive radiation research. *Proc. R. Soc. B* 273:1987–1998.
- Seehausen O. 2015. Process and pattern in cichlid radiations – inferences for understanding unusually high rates of evolutionary diversification. *New Phytol.* 207:304–312.
- Smith W.L., Chakrabarty P., Sparks J.S. 2008. Phylogeny, taxonomy, and evolution of Neotropical cichlids (Teleostei: Cichlidae: Cichlinae). *Cladistics* 24:625–641.
- Solís-Lemus C., Ané C. 2016. Inferring phylogenetic networks with maximum pseudolikelihood under incomplete lineage sorting. *PLoS Genet.* 12:e1005896.
- Solís-Lemus C., Bastide P., Ané C. 2017. Phylonetworks: a package for phylogenetic networks. *Mol. Biol. Evol.* 34:3292–3298.
- Solís-Lemus C., Yang M., Ané C. 2016. Inconsistency of species tree methods under gene flow. *Syst. Biol.* 65:843–851.
- Sparks J.S., Smith W.L. 2004. Phylogeny and biogeography of cichlid fishes (Teleostei: Perciformes: Cichlidae). *Cladistics* 20:501:517.
- Stamatakis A. 2014. RAxML version 8: a tool for phylogenetic analysis and post-analysis of large phylogenies. *Bioinformatics* 30:1312–1313.
- Stankiewicz J., de Wit M.J. 2006. A proposed drainage evolution model for Central Africa—did the Congo flow east? *J. Afr. Earth Sci.* 44:75–84.
- Steel M.A., Penny D. 1993. Distribution of tree comparison metrics – some new results. *Syst Biol* 42:126–141.
- Stiassny M.L.J. 1987. Cichlid familial interrelationships and the placement of the neotropical genus *Cichla* (Perciformes, Labroidei). *J. Nat. Hist.* 21:1311–1331.
- Stiassny M.L.J., Alter S.E. 2021. Life in the fast lane: diversity, ecology, and speciation of cichlids in the lower Congo River. In: Abate M.E., Noakes D.L.G., editors. The behavior, ecology and evolution of cichlid fishes. Dordrecht, The Netherlands: Springer Publishing. p. 107–133.
- Stiassny M.L.J., Schliewen U.K., Dominey W.J. 1992. A new species flock of cichlid fishes from Lake Bermin, Cameroon with a description of eight new species of *Tilapia* (Labroidei: Cichlidae). *Ichthyol. Explor. Fres.* 3:311–346.
- Streelman J.T., Karl S.A. 1997. Reconstructing labroid evolution using single-copy nuclear DNA. *Proc. R Soc. Lond. B* 264:1011–1020.
- Streelman J.T., Zardoya R., Meyer A., Karl S.A. 1998. Multilocus phylogeny of cichlid fishes (Pisces: Perciformes): evolutionary comparison of microsatellite and single-copy nuclear loci. *Mol. Biol. Evol.* 15:798–808.
- Suh A., Smeds L., Ellegren H. 2015. The dynamics of incomplete lineage sorting across the ancient adaptive radiations of Neoavian birds. *PLoS Biol.* 13:e1002224.
- Sültmann H., Mayer W.E., Figueroa F., Tichy H., Klein J. 1995. Phylogenetic analysis of cichlid fishes using nuclear DNA markers. *Mol. Biol. Evol.* 12:1033–1047.
- Svardal H., Quah F.X., Malinsky M., Ngatunga B.P., Miska E.A., Salzburger W., Genner M.J., Turner G.F., Durbin R. 2020. Ancestral hybridization facilitated species diversification in the Lake

- Malawi cichlid fish adaptive radiation. *Mol. Biol. Evol.* 37: 1100–1113.
- Takahashi T., Sota T. 2016. A robust phylogeny among major lineages of the East African cichlids. *Mol. Phylogenet. Evol.* 100:234–242.
- Takahashi T., Terai Y., Nishida M., Okada N. 2001. Phylogenetic relationships and incomplete lineage sorting among cichlid fishes in Lake Tanganyika as revealed by analyses of the insertion retroposons. *Mol. Biol. Evol.* 18:2057–2066.
- Takahashi T. 2003. Systematics of Tanganyika cichlid fishes (Teleostei: Perciformes). *Ichthyol. Res.* 50:367–382.
- Trewavas E. 1983. Tilapiine fishes of the genera *Sarotherodon*, *Oreochromis* and *Danakilia*. British Museum (Natural History): London.
- Turner G.F. 2007. Adaptive radiation of cichlid fish. *Curr. Biol.* 19:R827–R831.
- Wagner C.E., Harmon L.J., Seehausen O. 2012. Ecological opportunity and sexual selection together predict adaptive radiation. *Nature* 487:366–370.
- Wainwright P.C., Smith W.L., Price S.A., Tang K.L., Sparks J.S., Ferry L.A., Kuhn K.L., Eytan R.I., Near T.J. 2012. The evolution of pharyngognath: a phylogenetic and functional appraisal of the pharyngeal jaw key innovation in labroid fishes and beyond. *Syst. Biol.* 61:1001–1027.
- Weiss J.D., Cotterill F.P.D., Schliewen U.K. 2015. Lake Tanganyika—a ‘melting pot’ of ancient and young cichlid lineages (Teleostei: Cichlidae)? *PLoS One* 10:e0125043.
- Whitefield J.B., Lockhard P.J. 2007. Deciphering ancient rapid radiations. *Trends Ecol. Evol.* 22:258–265.
- Xi Z., Liu L., Davis C.C. 2016. The impact of missing data on species tree estimation. *Mol. Biol. Evol.* 33:838–860.
- Yu Y., Degnan L., Nakhleh L. 2012. The probability of a gene tree topology within a phylogenetic network with applications to hybridization detection. *PLoS Genet.* 8:e1002660.
- Yu Y., Dong J., Liu K.J., Nakhleh L. 2014. Maximum likelihood inference of reticulate evolutionary histories. *Proc. Natl. Acad. Sci. USA* 111:16448–16453.
- Zaccara S., Crosa G., Vanetti I., Binelli G., Harper D.M., Mavuti K.M., Balarin J.D., Britton J.R. 2014. Genetic and morphological analyses indicate high population mixing in the endangered cichlid *Alcolapia* flock of East Africa. *Conserv. Genet.* 15:429–440.
- Zebrino D.R., Birney E. 2008. Velvet: algorithms for de novo short read assembly using de Bruijn graphs. *Genome Res.* 18: 821–829.
- Zebrino D.R. 2009. extractContigReads. GitHub repository: <https://github.com/dzerbino/velvet/blob/master/contrib/extractContigReads/extractContigReads.pl>.
- Zhang C., Rabiee M., Sayyari E., Mirarab S. 2018. ASTRAL-III: polynomial time species tree reconstruction from partially resolved gene trees. *BMC Bioinformatics* 19:153.
